# Supplementary material for: Reversible photoresponsive activity of a carbonic anhydrase mimic
Source: Royal Society of Chemistry journal article supplement (doi:10.1039/c9cc00018f), 2019-01-01
Supplement: c9cc00018f1.pdf [file c9cc00018f1.pdf]

## A reversible photoresponsive activity of a carbonic anhydrase mimic

Monochura Saha and Subhajit Bandyopadhyay\*

### Contents

|                                                                                                                                           |         |
|-------------------------------------------------------------------------------------------------------------------------------------------|---------|
| Instrument and reagents:.....                                                                                                             | S2      |
| Scheme S1: Synthesis of the imidazole appended azobenzene compound <b>1</b> .....                                                         | S3      |
| Scheme S2: Synthesis of m-nitro benzyl imidazole compound <b>2</b> .....                                                                  | S3      |
| Experimental Section: .....                                                                                                               | S4      |
| Scheme S3: Synthesis of the polymer A.....                                                                                                | S6      |
| Photoisomerization studies: .....                                                                                                         | S7      |
| General procedure for the hydrolysis .....                                                                                                | S9      |
| Characterization data of compounds <b>1</b> , <b>2</b> and <b>4</b> .....                                                                 | S15-S19 |
| Figure S19-S25 (ESI/Q-TOF) spectrum of [Zn <sup>2+</sup> . <i>cis</i> - <b>1</b> ] and [Zn <sup>2+</sup> . <i>trans</i> - <b>1</b> ]..... | S21-S27 |
| Figure S26: Far-IR spectra of <i>cis</i> and <i>trans</i> complex of compound <b>1</b> with Zn(OAc) <sub>2</sub> .....                    | S29     |
| Figure S27 DLS data of [Zn <sup>2+</sup> . <i>trans</i> - <b>1</b> ].....                                                                 | S29     |
| Figure S28 Profiles of pH with CO <sub>2</sub> hydration.....                                                                             | S30     |
| Figure S29 Cartoon representation of transition state stabilization.....                                                                  | S30     |
| Figure S30 Spectral characteristics of cationic polymer.....                                                                              | S31     |
| Figure S32: XRD structure and data of compound <b>1</b> .....                                                                             | S32-S36 |

## Instrument and reagents

All reactants and reagents were commercially available and were used without further purification unless otherwise indicated. Styrene (99%) and 2-(dimethylamino) ethyl methacrylate (DMAEMA, 98%) were passed through a basic alumina column before polymerization. 2,2'-azobisisobutyronitrile (AIBN, Sigma, 98%) was recrystallized twice from methanol. The chain transfer agent (CTA), 4-cyano-4-(dodecyl sulfanyl thiocarbonyl) sulfanyl pentanoic acid (CDP), was prepared as previously reported.<sup>1</sup> Anhydrous *N,N*-dimethylformamide (DMF, Sigma Aldrich, 99.9%) and CDCl<sub>3</sub> (Cambridge isotope, 99% D) were used as received. The sodium salt of the commercially available (Sigma Aldrich) Polystyrene-*block*-poly(acrylic acid), DDMAT terminated (PS:PAA 3,000:5,000, PDI  $\leq 1.1$ ) was used as the negative charged polymer. The NMR spectra were recorded with 500 MHz Bruker and 400 MHz Jeol instruments. Chemical shifts are reported in  $\delta$  values relative to the solvent peaks. The solvents used for the spectroscopy experiments were of the spectroscopic grades and were free from any fluorescent impurities. Double. UV spectra were recorded with an Agilent Cary 60 UV-vis spectrophotometer. The mass spectrometric data were obtained from an Acquity<sup>TM</sup> Ultra Performance LC-ESI/quadrupole-TOF MS. X-ray data were collected with Mo K $\alpha$  radiation by a Bruker APEX-2 CCD diffractometer. The data were processed using Bruker SAINT package. The structure solution and refinement were performed by SHELX97. FT-IR spectroscopy in the solid state was performed with a Perkin Elmer Spectrum RX1 spectrophotometer using KBr disk method and the far infrared spectra were recorded by using Bruker ALPHA FTIR spectrometer. It was recorded in absorbance mode from the range 200-500 cm<sup>-1</sup> with a resolution of 1 cm<sup>-1</sup> and was obtained by averaging over 20 scans. All samples were measured in vacuum and at room temperature. Melting point was measured with a Secor, India digital melting point apparatus in melting point tube. pH data were recorded with a PB-11 Sartorius pH Meter calibrated at pH 4, 7 and 10. DLS data were recorded with HORIBA Scientific Nano Partica NANO PARTICLE ANALYZER SZ-100.

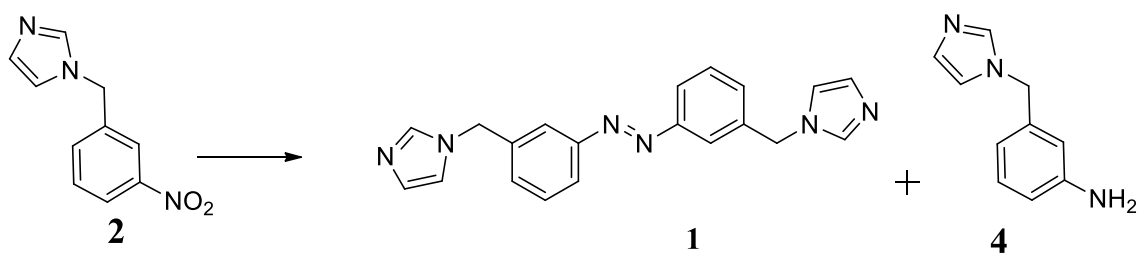

**Conditions :** NaOH, Glucose, EtOH, H<sub>2</sub>O, reflux, 24h

Scheme **S1**: Synthesis of the imidazole appended azobenzene compound **1**

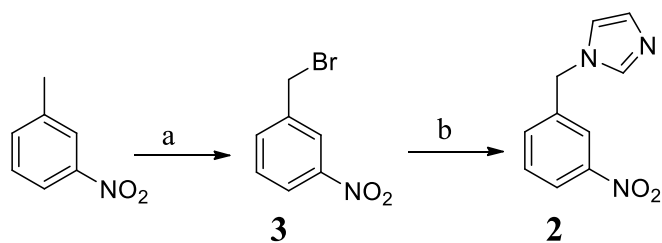

**Conditions:** (a) NBS, CCl<sub>4</sub>, AIBN, Reflux, 2h (b) Imidazole, K<sub>2</sub>CO<sub>3</sub>, CH<sub>3</sub>CN, Reflux, 18h

Scheme **S2**: Synthesis of *m*-nitro benzyl imidazole compound **2**

## Experimental Section

### *Synthesis of imidazole-appended azobenzene (1)*

To a solution of NaOH (1.94 g, 48.5 mmol) in EtOH/H<sub>2</sub>O mixture, compound **2** (0.985 g, 4.85 mmol) was added. A solution of glucose (8.7 g, 48.5 mmol) in hot water was added to the reaction mixture carefully. The mixture was then heated under reflux for 24 h upon which the orange solution turned into red in color. Upon completion of the reaction, the reaction mixture was concentrated under vacuum; the residue was extracted with ethyl acetate, washed with brine, and dried over Na<sub>2</sub>SO<sub>4</sub>. After the evaporation of the solvent, the crude material was purified by chromatography (100-200) mesh, silica gel deactivated with 5% triethyl amine, using MeOH/ EtOAc( 1:19) as eluent upon which compound **1** was obtained as an orange solid (0.356 g, 42 %). Melting point: 163-165 °C; <sup>1</sup>H NMR: (400 MHz, CDCl<sub>3</sub>) δ 7.94 (d, *J* = 6.3 Hz, 2H), 7.78 (s, 2H), 7.69 (s, 2H), 7.59 (t, *J* = 6.3 Hz, 2H), 7.34 (d, *J* = 5.6 Hz, 2H), 7.19 (s, 2H), 7.03 (s, 2H), 5.30 (s, 4H). <sup>13</sup>C NMR (100 MHz, CDCl<sub>3</sub>) δ 153.6, 138.2, 130.7, 130.6, 130.5, 130.4, 123.8, 122.2, 120.0, 51.26; IR (KBr): 2982, 2917, 1637, 1585, 1414, 1362, 1121, 1034 cm<sup>-1</sup>. ESI-MS *m/z* (calc.) [M+H]<sup>+</sup> = 343.1671, [M+Na] = 365.1491, [M+K] = 381.1230. (obtained) [M+H]<sup>+</sup> = 343.1678, [M+Na] = 365.1519, [M+K] = 381.1302 are obtained from experimentally.

UV-Vis Data: The *trans* isomer of compound **1** displayed absorption bands at λ<sub>max</sub> = 230, 319, and 440 nm. The band at λ<sub>max</sub> = 319 nm (ε = 11,800 M<sup>-1</sup>cm<sup>-1</sup>) corresponds to a π-π\* transition, and the band at 440 nm is a symmetry forbidden n-π\* band (ε = 110 M<sup>-1</sup>cm<sup>-1</sup>). For the *cis* **1** λ<sub>max</sub> 319 (ε = 7040 M<sup>-1</sup>.cm<sup>-1</sup>) corresponds to a π-π\* transition and a new peak appeared at 440 nm (ε = 400 M<sup>-1</sup>.cm<sup>-1</sup>).

XRD-Data: single crystal XRD (CCDC 1846676)

### **Synthesis of *m*-nitro benzyl imidazole (2)**

To the anhydrous solution of *m*-nitro benzyl bromide (0.990 g, 4.58 mmol) in acetonitrile, K<sub>2</sub>CO<sub>3</sub> (3.9 g, 27.48 mmol) and imidazole (1.24 g, 18.3 mmol) were added. The mixture was refluxed for 15 h under argon. Upon completion of the reaction, the reaction mixture was filtered through a sintered funnel and the solvent was removed under vacuum. The residue was dissolved in EtOAc (200 mL) and the organic phase was washed with a saturated Na<sub>2</sub>CO<sub>3</sub> aqueous solution (50 mL), dried over Na<sub>2</sub>SO<sub>4</sub>, and evaporated to dryness under vacuum. The crude mixture was purified by column chromatography using 100 – 200 mesh silica gel and MeOH: EtOAc as eluent to give the *m*-nitro benzyl imidazole as a yellowish solid (0.760 g, 77 %); **Melting point:** 72-75 °C; **<sup>1</sup>H NMR:** (500 MHz, CDCl<sub>3</sub>) δ 8.17 (d, *J* = 8.2 Hz, 1H), 8.04 (s, 1H), 7.58 (s, 1H), 7.54 (dd, *J* = 8.2, 7.9 Hz, 1H), 7.42 (d, *J* = 7.6 Hz, 1H), 7.13 (s, 1H), 6.92 (s, 1H), 5.23 (s, 2H); **<sup>13</sup>C NMR** (100 MHz, CDCl<sub>3</sub>) δ 143.9, 139.1, 138.2, 133.6, 131.2, 130.9, 124.0, 122.8, 119.9, 50.6; IR (KBr) 2965 (w), 2908 (w), 1615 (m), 1421 (s), 1362 (s), 1025 (s), 907 (m), 739 (m), 617 (w), 558 (w) cm<sup>-1</sup>; ESI-MS *m/z* (calc.) 204.07 [M+H]<sup>+</sup>, (obtained) 204.14;

### **Synthesis of *m*-nitro benzyl bromide (3)**

To a solution of *m*-nitro toluene (2 gm, 14.59) in CCl<sub>4</sub> (45 mL), NBS (2.85 gm, 16.05 mmol) and AIBN (140 mg, 1.459 mmol) were added and the mixture was refluxed for 2h. The reaction was monitored by TLC. Upon completion, the reaction mixture was filtered and the solvent was evaporated under vacuum. The product was purified by column chromatography by using hexane as eluent and the product was obtained as a white solid ( 1.92 g, 60 %).

**<sup>1</sup>H NMR** (400 MHz, CDCl<sub>3</sub>) δ 8.25 (d, *J* = 2.28 Hz, 1H), 8.15 (dd, *J* = 8 and 2.28 Hz, 1H), 7.72 (d, *J* = 7.64 Hz, 1H), 7.53 (dd, *J* = 8.4, 7.64, 1H), 4.53 (s, 4H); **<sup>13</sup>C NMR** (100 MHz, CDCl<sub>3</sub>) δ 148.3, 139.6, 134.9, 129.8, 123.8, 123.2, 31.0

**RAFT Copolymerization of DMAEMA and Styrene.** In a typical RAFT copolymerization procedure, DMAEMA (440.2 mg, 2.8 mmol), styrene (437.44 mg, 4.2 mmol), CDP (70.6 mg, 0.175 mmol), AIBN (5.75 mg, 0.035 mmol) and DMF (2.4 g) were sealed in a 20 mL glass vial equipped with a magnetic stir bar and purged with dry N<sub>2</sub> for 20 min and the reaction vial was kept in a preheated reactor at 70 °C. The [DMAEMA + Styrene]:[CDP]:[AIBN] ratio was kept at 40:1:0.2, while the concentration ratio of DMAEMA and styrene in the feed was fixed at 40:60, respectively. The polymerization was allowed to continue for 6 h and the resulting solution was quenched by cooling in ice cold water and exposed to air. Approximately 3 mL acetone was added to this solution, and the polymer was precipitated into cold hexanes. The copolymer was re-precipitated four times from acetone/hexanes and dried under high vacuum at room temperature for 18 h. The purified polymer (200 mg, 0.03 mmol) was treated with methyl iodide (2 mL, 0.5 mmol, 20 eq) in acetonitrile under 40 °C heat for 12h. Evaporated the acetonitrile solvent under reduced pressure and purified by ethyl acetate. C H N Analysis of Polymer **A**: C, 53.65; H, 7.25; I, 15.75; N, 3.48; Experimentally Found: C, 44.3; H, 7.14; N, 2.32

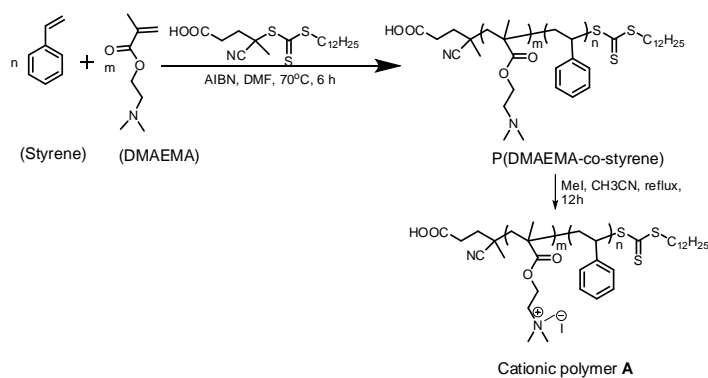

**Scheme S3:** Synthesis of the cationic polymer **A**

## Photoisomerization studies:

Photoisomerization experiments were performed with compound **1** (30  $\mu$ M) in MeOH. The *E* to *Z* photoisomerization of azobenzene was observed by irradiating the sample with 366 nm UV light (8 W, irradiation power 2.3 mW cm<sup>-2</sup>) under ice-cold conditions (273K). The reverse isomerization (*Z* to *E*) was achieved by exposing the sample with blue LED light (8 W) at 0 °C. The isomerization was monitored by studying the change in the UV/Vis absorption spectra and also by <sup>1</sup>H NMR analysis.

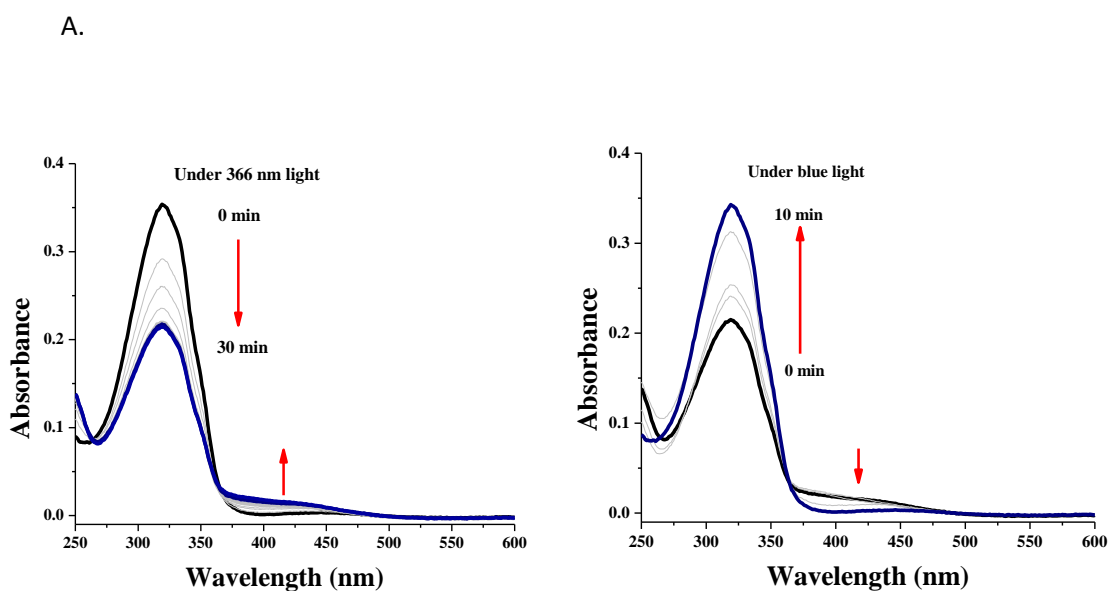

**Fig. S1.** Changes in electronic absorption spectrum for the **(A)** *E* to *Z* and **(B)** *Z* to *E* isomerization of the azobenzene **1** upon exposure to 366 nm UV light and 466 nm blue light respectively in MeOH (30  $\mu$ M) at 273K.

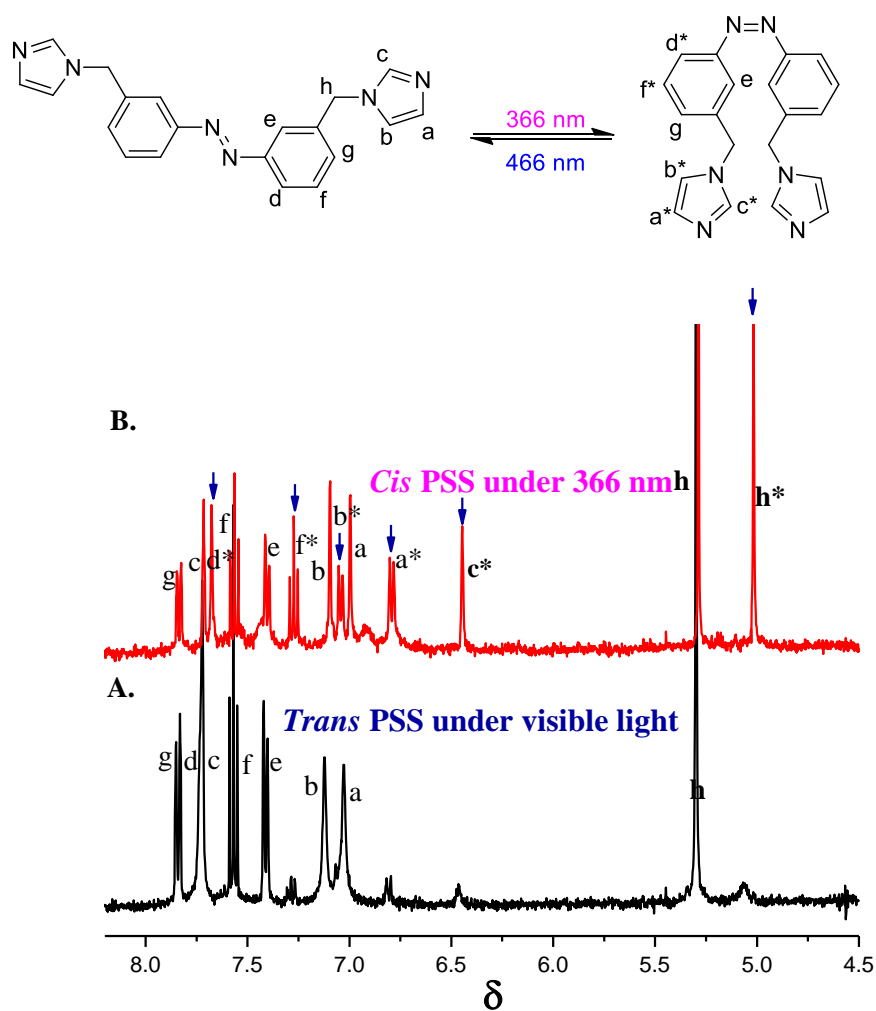

**Fig. S2.** NMR traces of compound **1** in CD<sub>3</sub>OD (10<sup>-2</sup> M) displaying the clear shift in the aromatic and aliphatic protons upon photo isomerization. (A) After radiation of the *trans* form with 366 nm light for 240 min; (B) *trans* form (bottom trace). New peaks are indicating by arrow sign.

## General procedure for the hydrolysis

Each assay was performed on 3 mL of samples prepared in 1 mM PBS buffered at pH 7.6 solution with the azobenzene derivative (9  $\mu\text{M}$ ) or nothing (as control). The reactions were performed in the darkness at 25  $^{\circ}\text{C}$ . The photoirradiated (Z)-form of the catalyst was exposed to the 366 nm light periodically for ensuring its retention in the (Z)-form. The formation of the 4-nitrophenol (4-NP) was monitored by the appearance of the peak at 400 nm with UV/vis spectroscopy at room temperature. The concentration of the 4-NP species was calculated at individual pH from the molar absorptivity of the species at each of the pH at 400 nm.

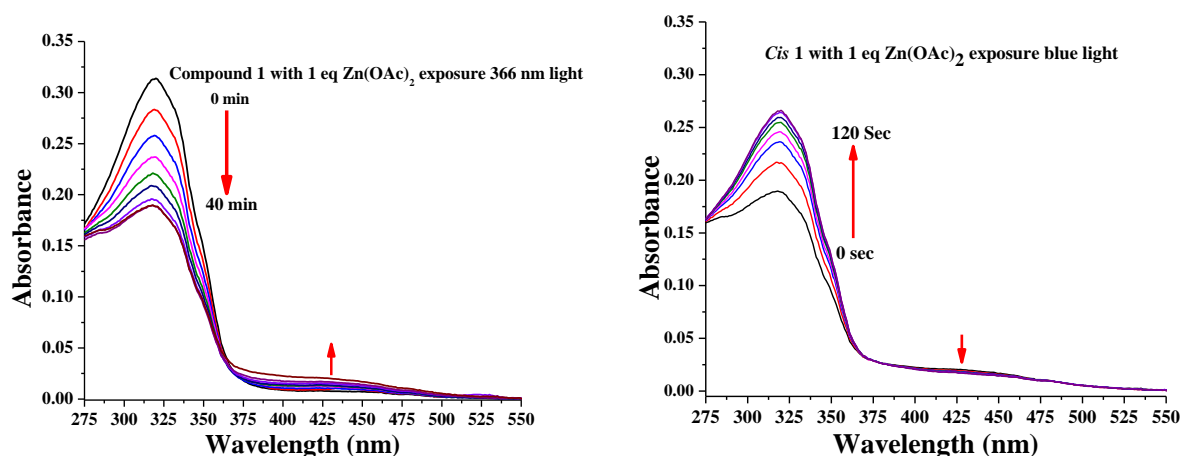

**Fig. S3.** Changes in electronic absorption spectrum for (A). *E* to *Z* and (B). *Z* to *E* isomerization of azobenzene **1** (30  $\mu\text{M}$ ) with  $\text{Zn}(\text{OAc})_2$  (30  $\mu\text{M}$ ) upon exposure to 366 nm UV light and 466 nm blue light respectively in MeOH solution.

With increasing the  $\text{Zn}(\text{OAc})_2$  in the azobenzene solution, it is observed that there was a 10 nm blue shift of the  $\pi\text{-}\pi^*$  band from 319 nm to 309 nm. The  $[\text{Zn}^{2+}\cdot\mathbf{1}]$  was also studied by NMR spectroscopy.

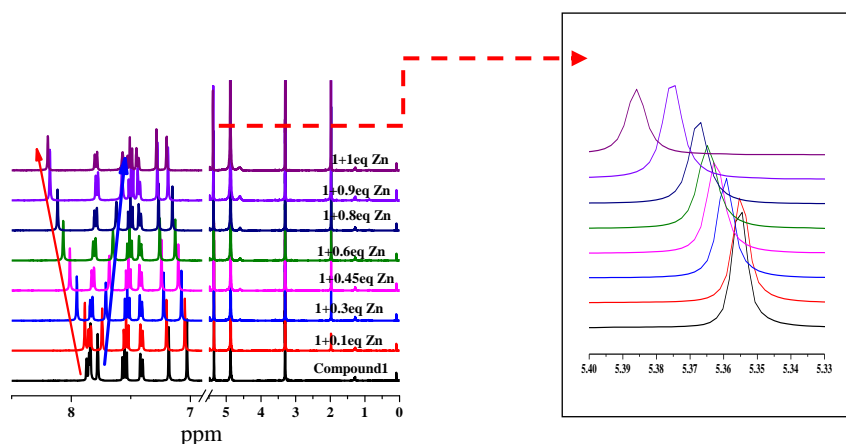

**Fig. S4.** Systematic NMR titration of *trans* **1** with gradual increase of  $\text{Zn}(\text{OAc})_2$  in  $\text{MeOD}:\text{D}_2\text{O}(6:1)$  mixture, red arrow for the  $c^*$  proton, blue arrow for the  $a^*$  proton and black arrows for the  $h^*$  proton

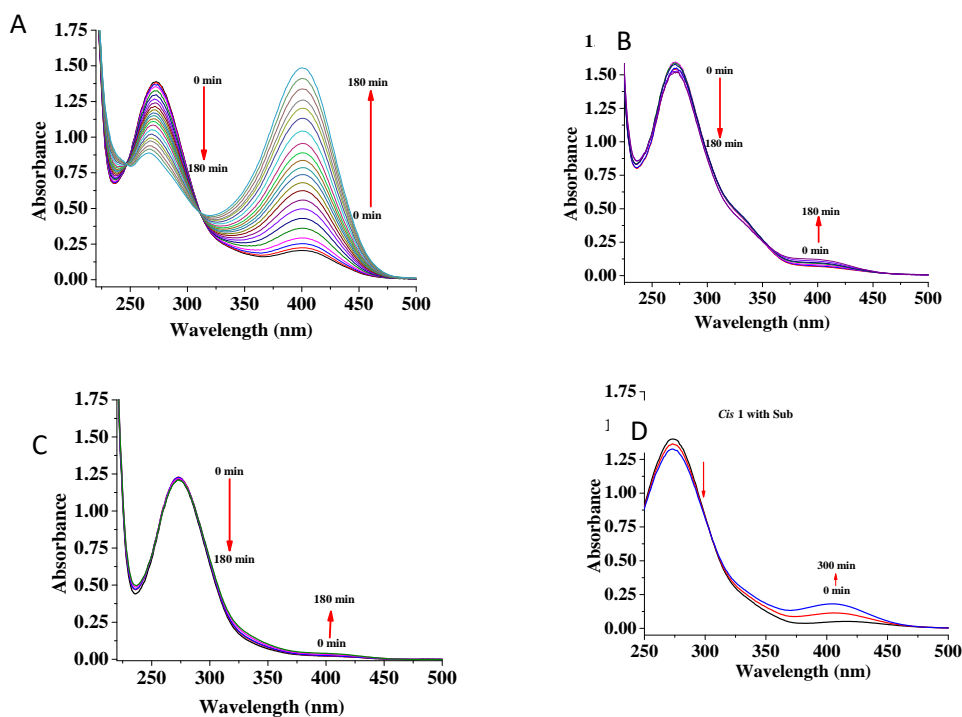

**Fig. S5.** UV-Vis spectra with the monitoring the hydrolysis of the pNPA substrate with the catalyst in PBS buffered at pH 7.6 (A) With [*Cis* **1** +  $\text{Zn}$ ] ( $30\ \mu\text{M}$ ) with the pNPA-substrate ( $150\ \mu\text{M}$ )., (B). With [*Trans* **1** +  $\text{Zn}^{2+}$ ] with Substrate (C). Only  $\text{Zn}^{2+}$  (D). Only *Cis* **1** (No  $\text{Zn}^{2+}$ ).

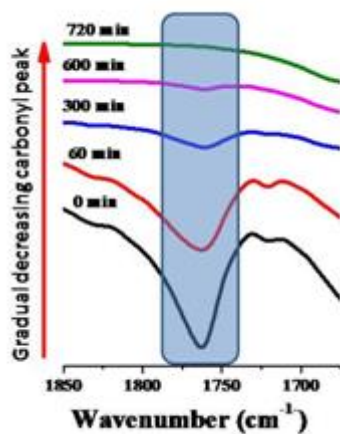

**Fig. S6.** The disappearance of the carbonyl peak of the pNP substrate upon the catalysis with [*cis* **1**. Zn<sup>2+</sup>] at 25 °C. The IR spectra was recorded with dried aliquots at different time intervals in KBr.

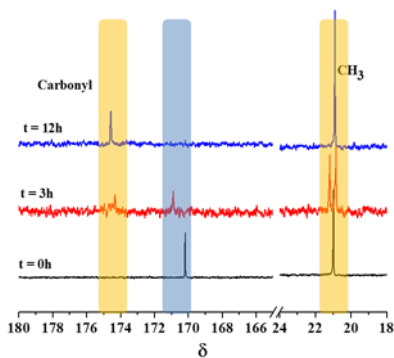

**Fig. S7.** <sup>13</sup>C NMR traces of pNPA hydrolysis of pNPA (30 mM) upon hydrolysis with the [Zn<sup>2+</sup>. *cis*-**1**] (0.3 mM) in CD<sub>3</sub>OD-D<sub>2</sub>O (1:1 v/v) (PBS buffered at pH 7.6).

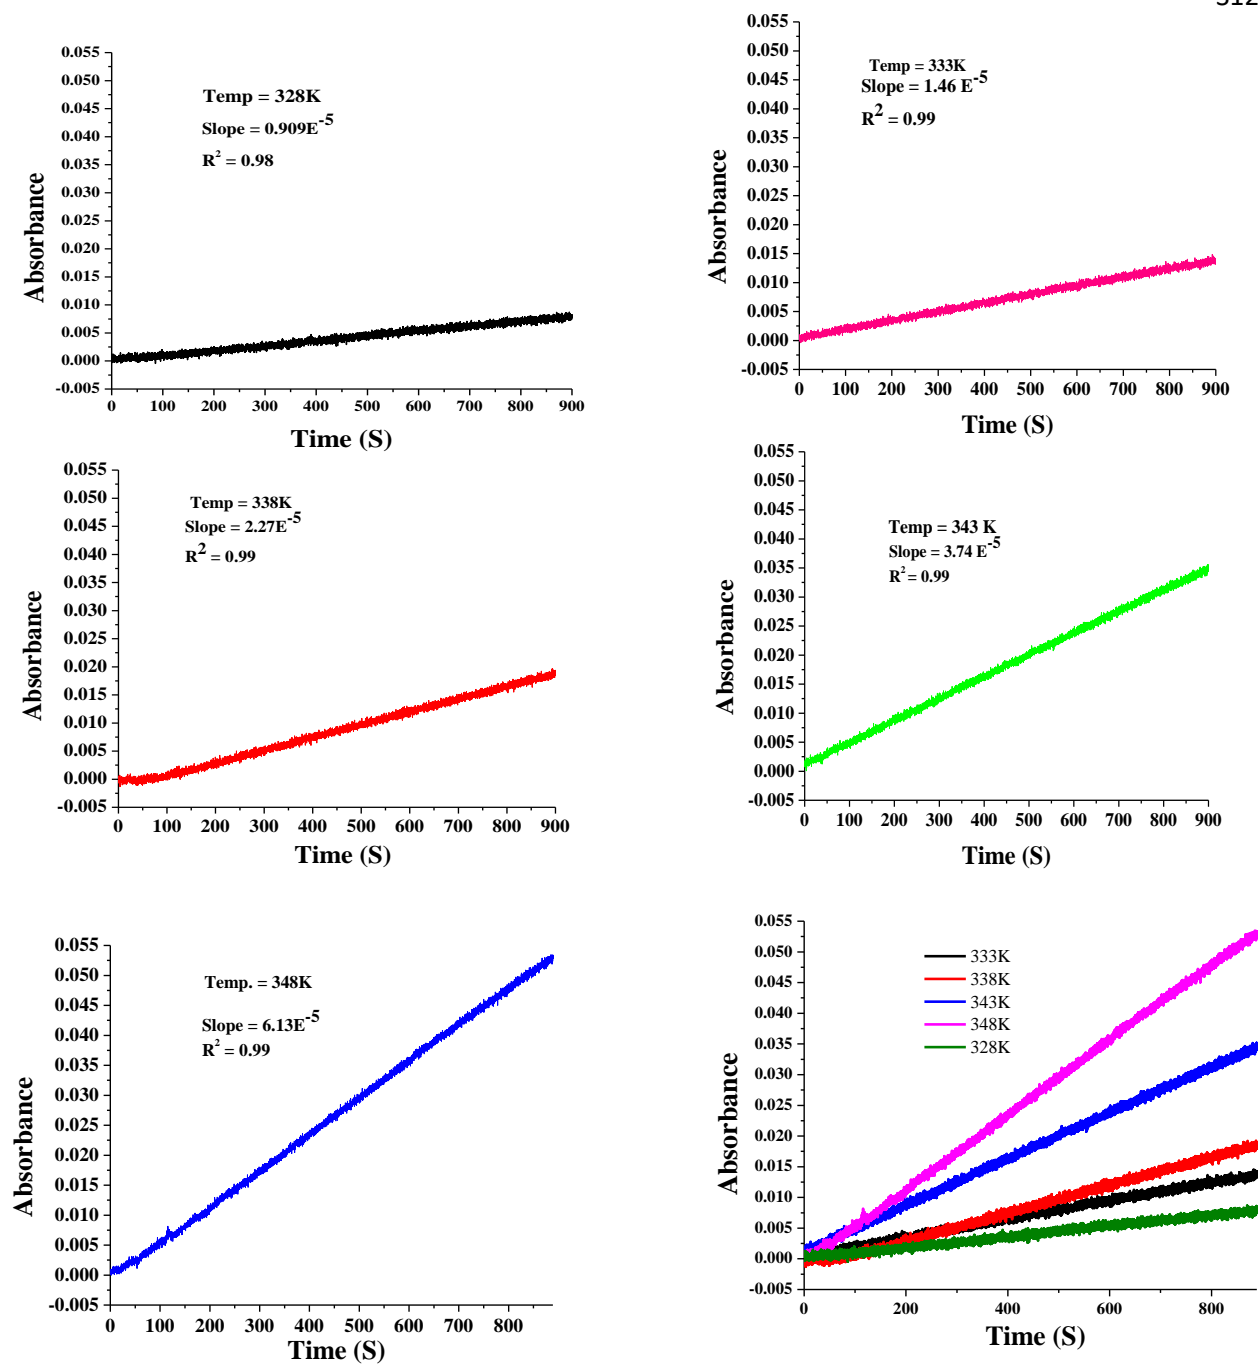

**Fig. S8.** Thermal isomerization studies of the (Z) to (E) isomer of the azobenzene **1** at various temperatures.

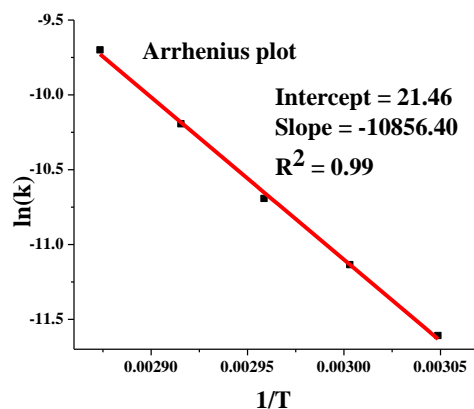

**Fig. S9.** (A) Arrhenius and (B) Eyring plots for the determination of the activation parameters for the thermal reversal of the (Z) to the (E) isomer.

**Table S1:** Thermodynamic parameters for the (Z) to (E) isomerization of the azobenzene **1**.

| Parameters           | $\Delta E_{\text{act}}$ (kcal mol <sup>-1</sup> ) | $\Delta H^\ddagger$ (kcal mol <sup>-1</sup> ) | $\Delta S^\ddagger$ (cal mol <sup>-1</sup> K <sup>-1</sup> ) |
|----------------------|---------------------------------------------------|-----------------------------------------------|--------------------------------------------------------------|
| Values $\pm$ (error) | 21.5 $\pm$ (0.5)                                  | 21.5 $\pm$ (0.5)                              | 42 $\pm$ (2)                                                 |

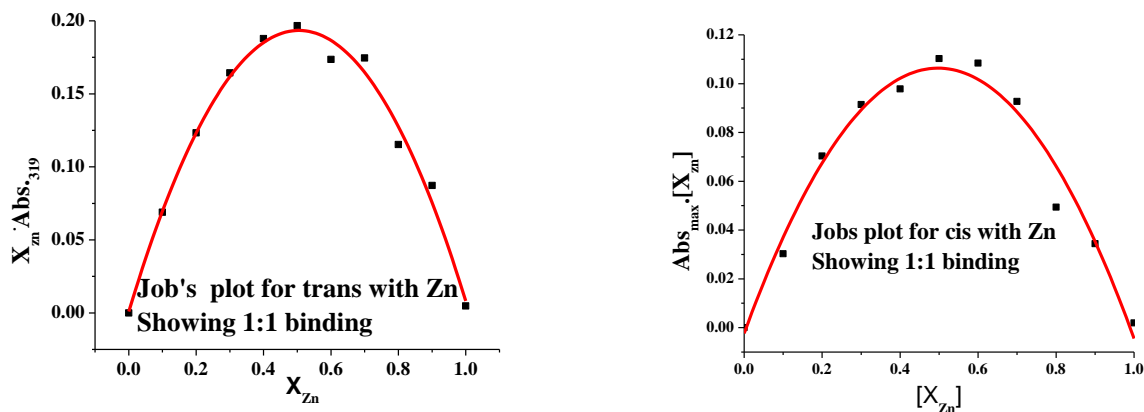

**Fig. S10.** Job's plots indicating 1:1 complexation of compound **1** with Zn<sup>2+</sup> ions in methanol media at a total concentration of 0.1 mM of **1** and Zn<sup>2+</sup>.

From the Job's plot the 1:1 association of compound **1** (both *cis* and *trans*) with Zn<sup>2+</sup> was found.

**Table S2:** Background reactions: Pseudo first order rate constants ( $k$ ) for under various conditions in the absence of polymer **A**.

| Catalytic conditions*<br>(Without the cationic polymer <b>A</b> )                       | Rate constant $k$ ( $\text{min}^{-1}$ ) $\times 10^{-4}$ |
|-----------------------------------------------------------------------------------------|----------------------------------------------------------|
| [ <i>Cis</i> <b>1</b> + $\text{Zn}^{2+}$ ] ((30 $\mu\text{M}$ ))                        | 277                                                      |
| [ <i>Trans</i> - <b>1</b> . $\text{Zn}^{2+}$ ] (30 $\mu\text{M}$ )                      | 9.02                                                     |
| [ <i>Cis</i> <b>1</b> + $\text{Zn}^{2+}$ ] ((30 $\mu\text{M}$ ) (With negative polymer) | 130                                                      |
| Only $\text{Zn}^{2+}$ (30 $\mu\text{M}$ )                                               | 1.06                                                     |
| <i>Cis</i> - <b>1</b> (30 $\mu\text{M}$ , no metal ions)                                | 10.0                                                     |
| <i>Trans</i> - <b>1</b> (30 $\mu\text{M}$ , no metal ions)                              | 6.25                                                     |
| Only Substrate in PBS buffer 1 mM                                                       | 1.06                                                     |

**\*General conditions:** 1 mM PBS buffer at pH 7.6, 25 °C.

Upon alternating irradiation of 366 and 466 nm light and repeating the sequence of the irradiation in multiple cycles, the corresponding absorbance of **1**, and the peak at 309 nm was used to monitor the switching in cycles.

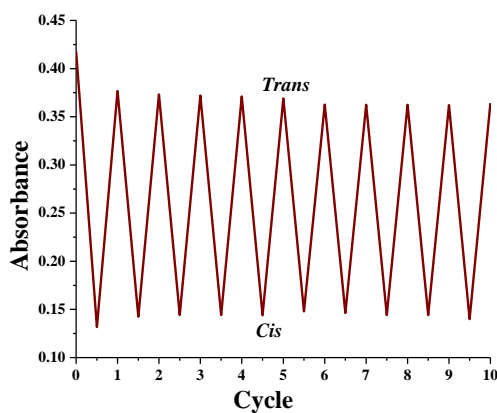

**Fig. S11.** The changes in the absorbance values of *trans/cis* **1** ( $3 \times 10^{-5}$  M) at 309 nm after alternating irradiations at 366 nm (half cycles) and 466 nm (full cycles) over ten complete cycles.

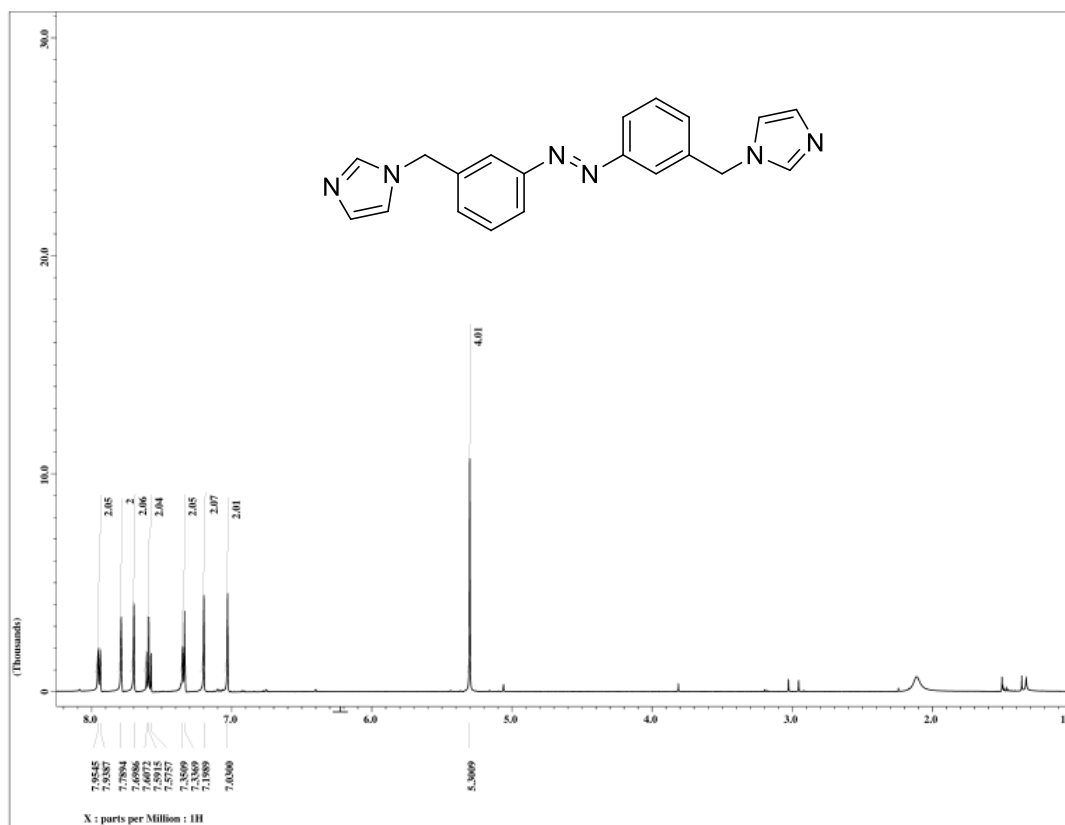

**Fig. S12.** <sup>1</sup>H NMR spectrum of compound 1

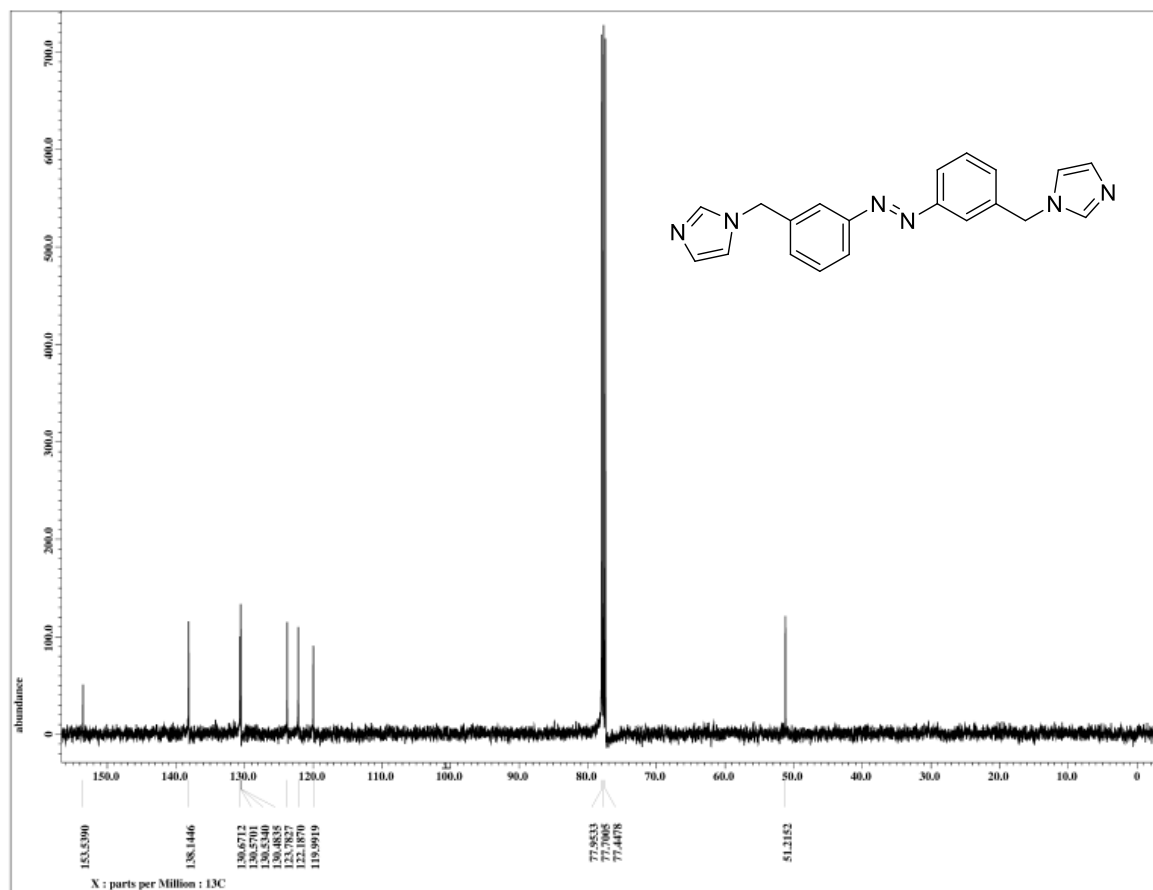

Fig. S13.  $^{13}\text{C}$  NMR spectrum of compound 1

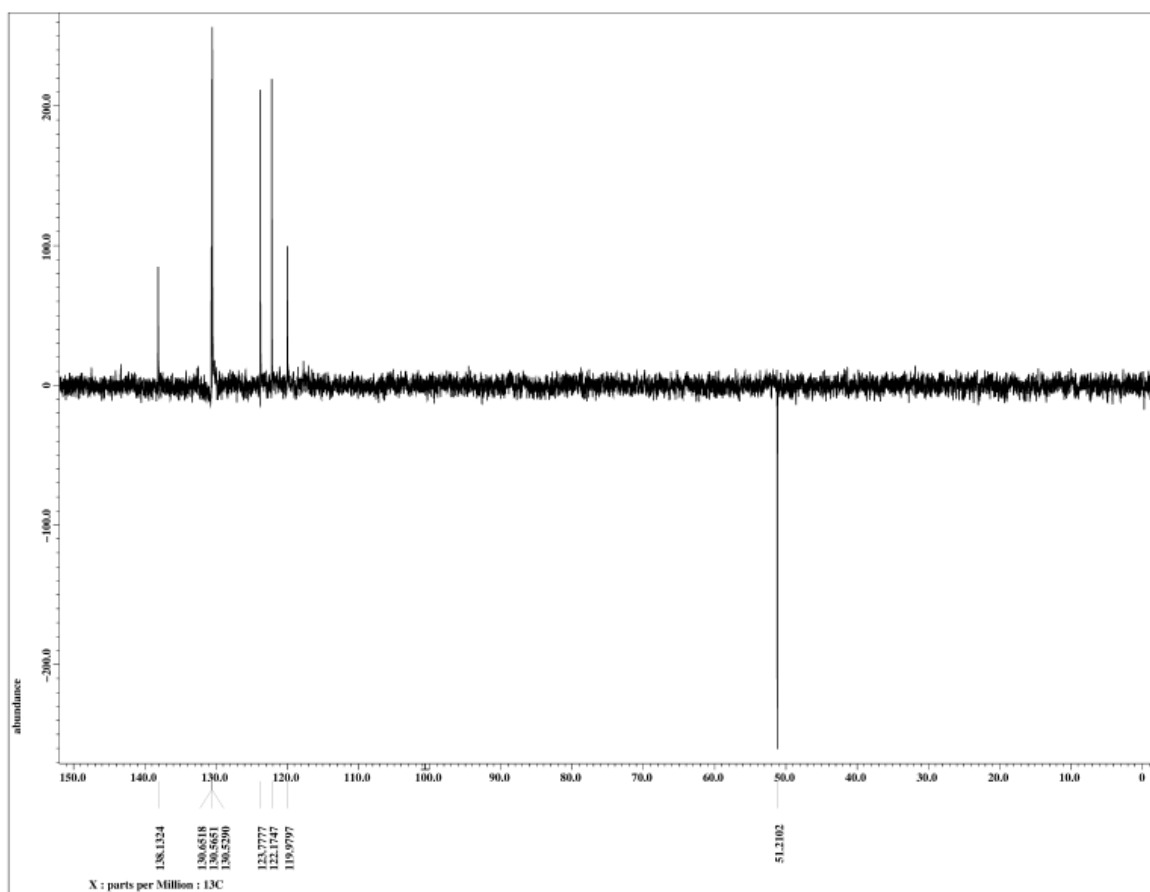

**Fig. S14.** DEPT spectrum of compound **1**

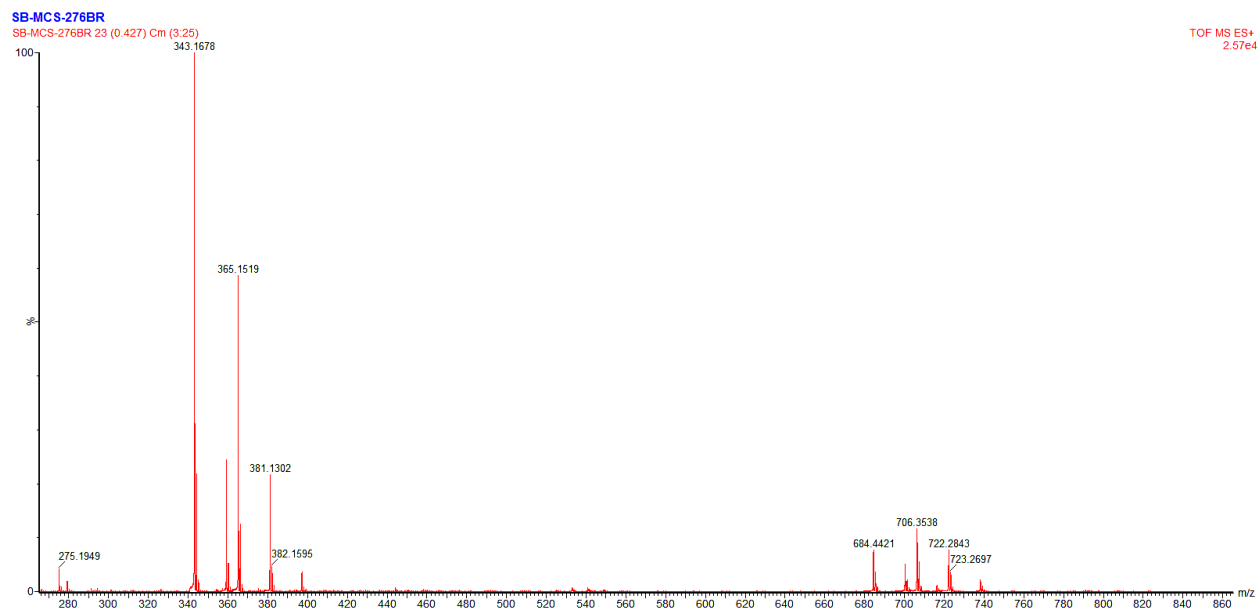

**Fig. S15.** ESI MS of compound 1,  $[M+H]^+ = 343.1678$ ,  $[M+Na] = 365.1519$ ,  $[M+K] = 381.1302$  are obtained from experimentally.

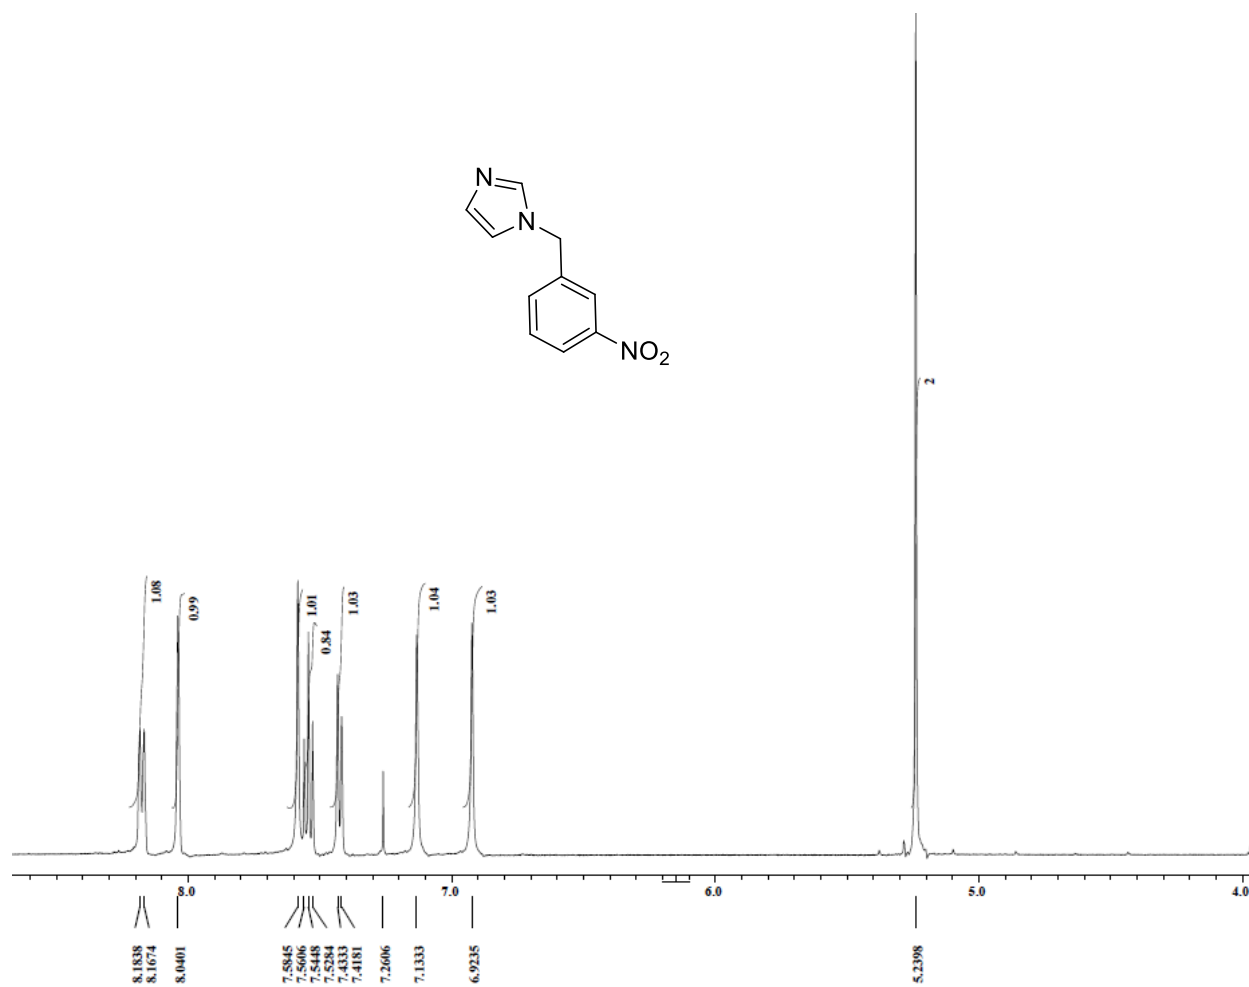

**Fig. S16.** <sup>1</sup>H NMR spectrum of compound 2

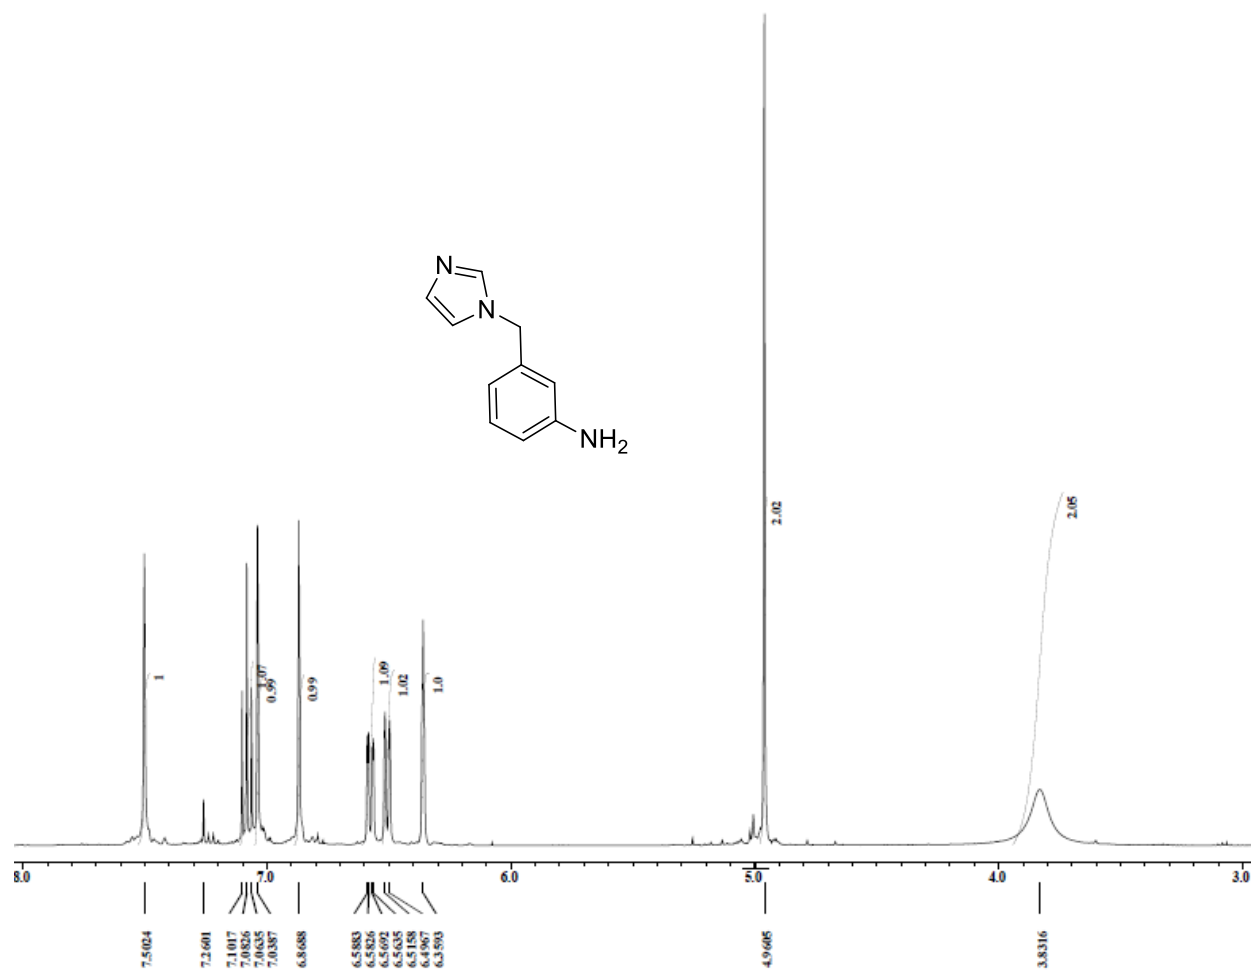

**Fig. 17.**  $^1\text{H}$  NMR spectrum of Compound 4

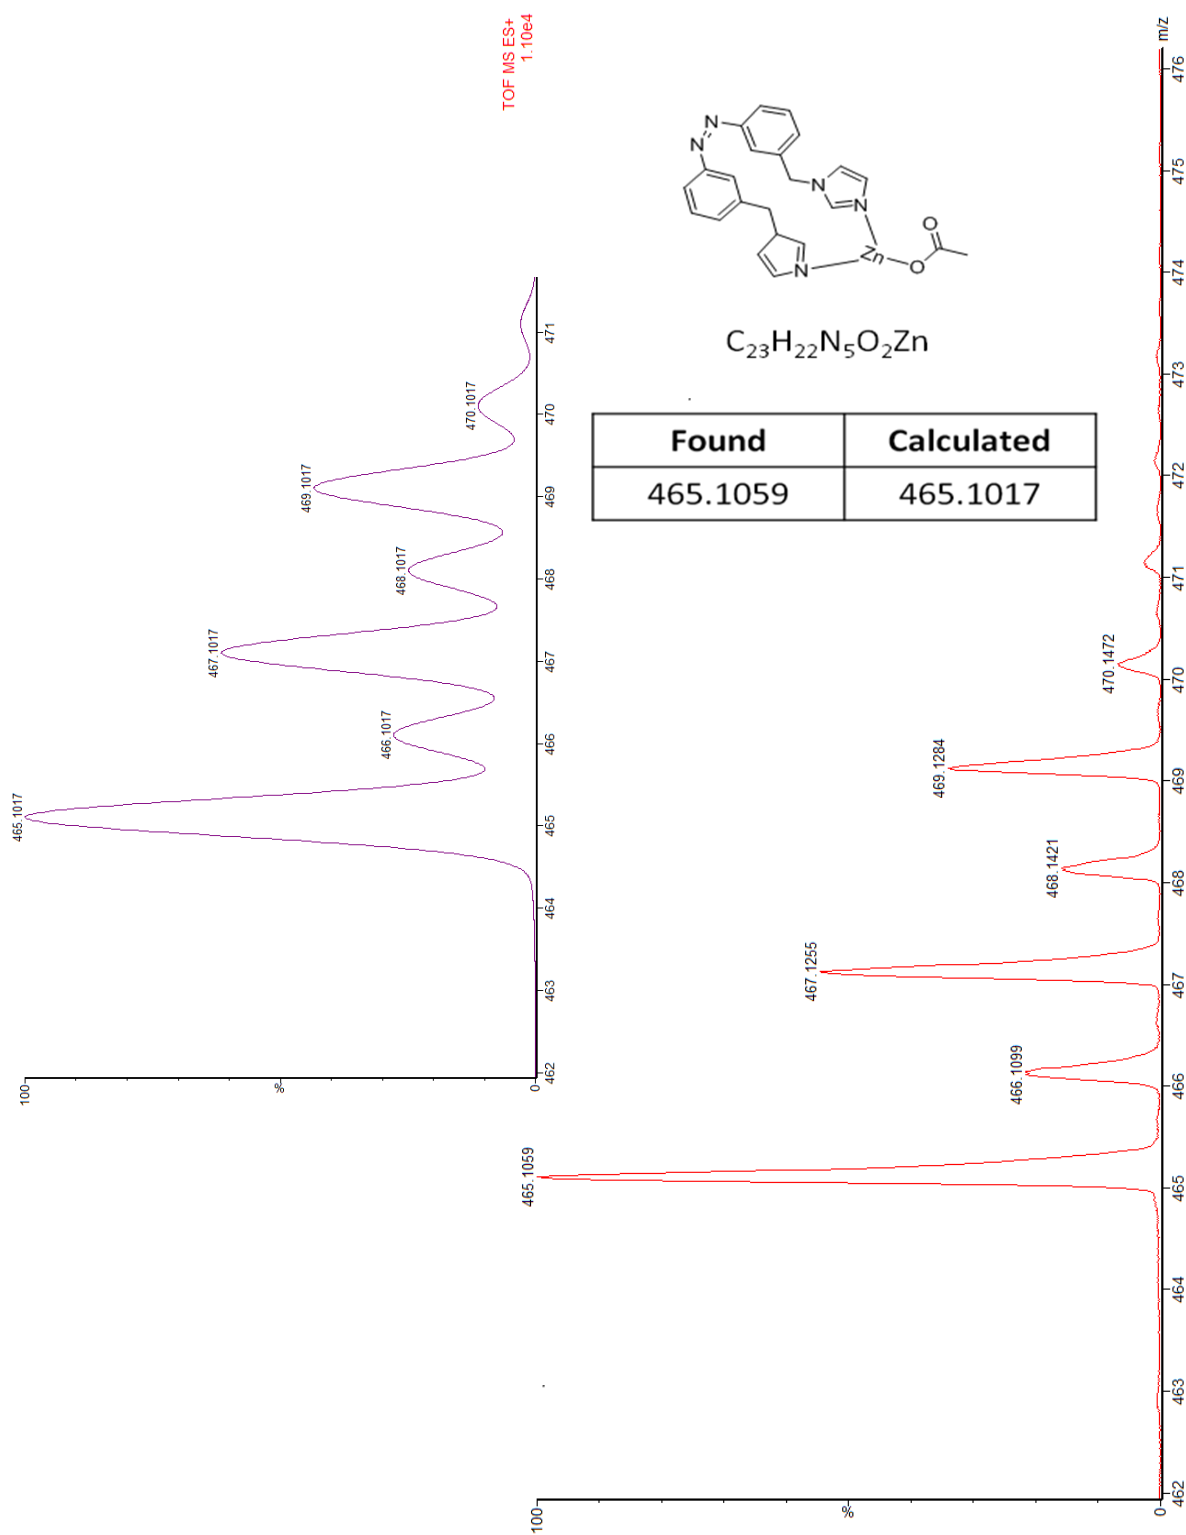

**Fig S18.** Calculated (top) and HRMS (ESI/Q-TOF) spectrum of  $[Zn^{2+} \cdot cis-1]$

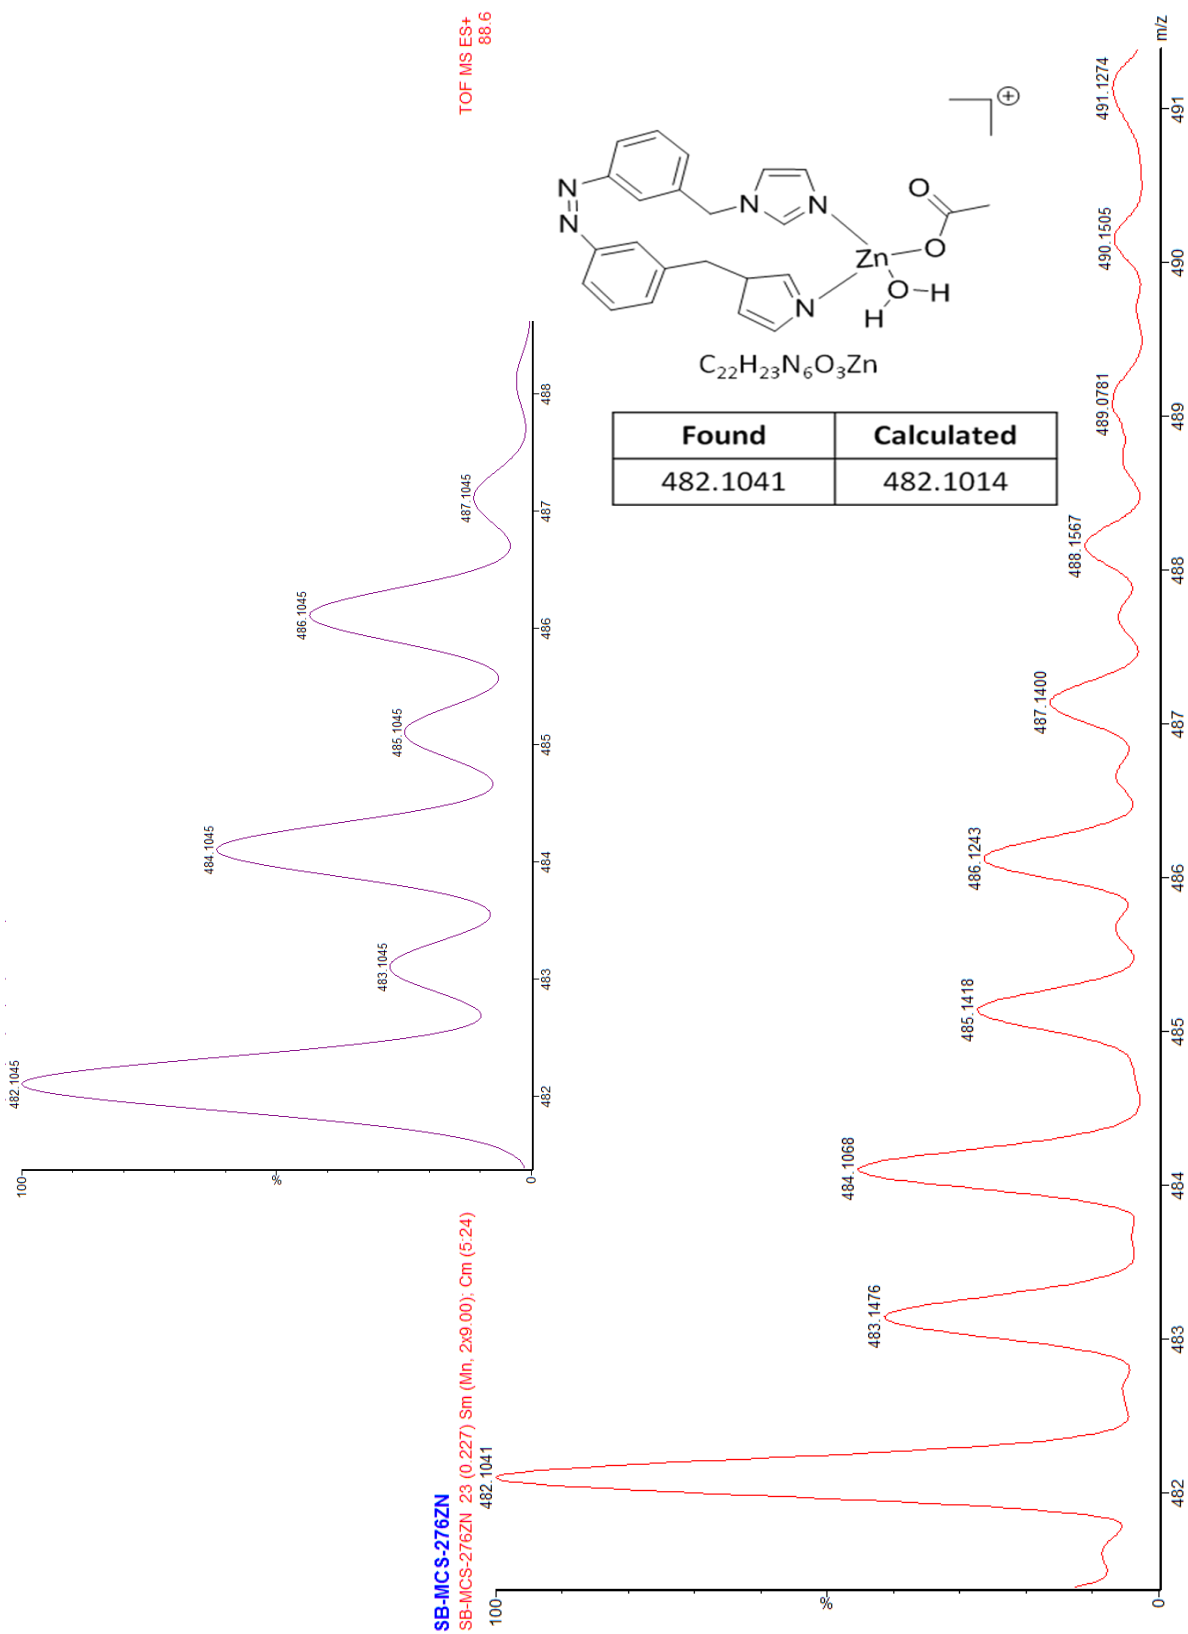

**Fig. S19.** Calculated (top) and HRMS (ESI/Q-TOF) spectrum of  $[Zn^{2+} \cdot cis-1]$

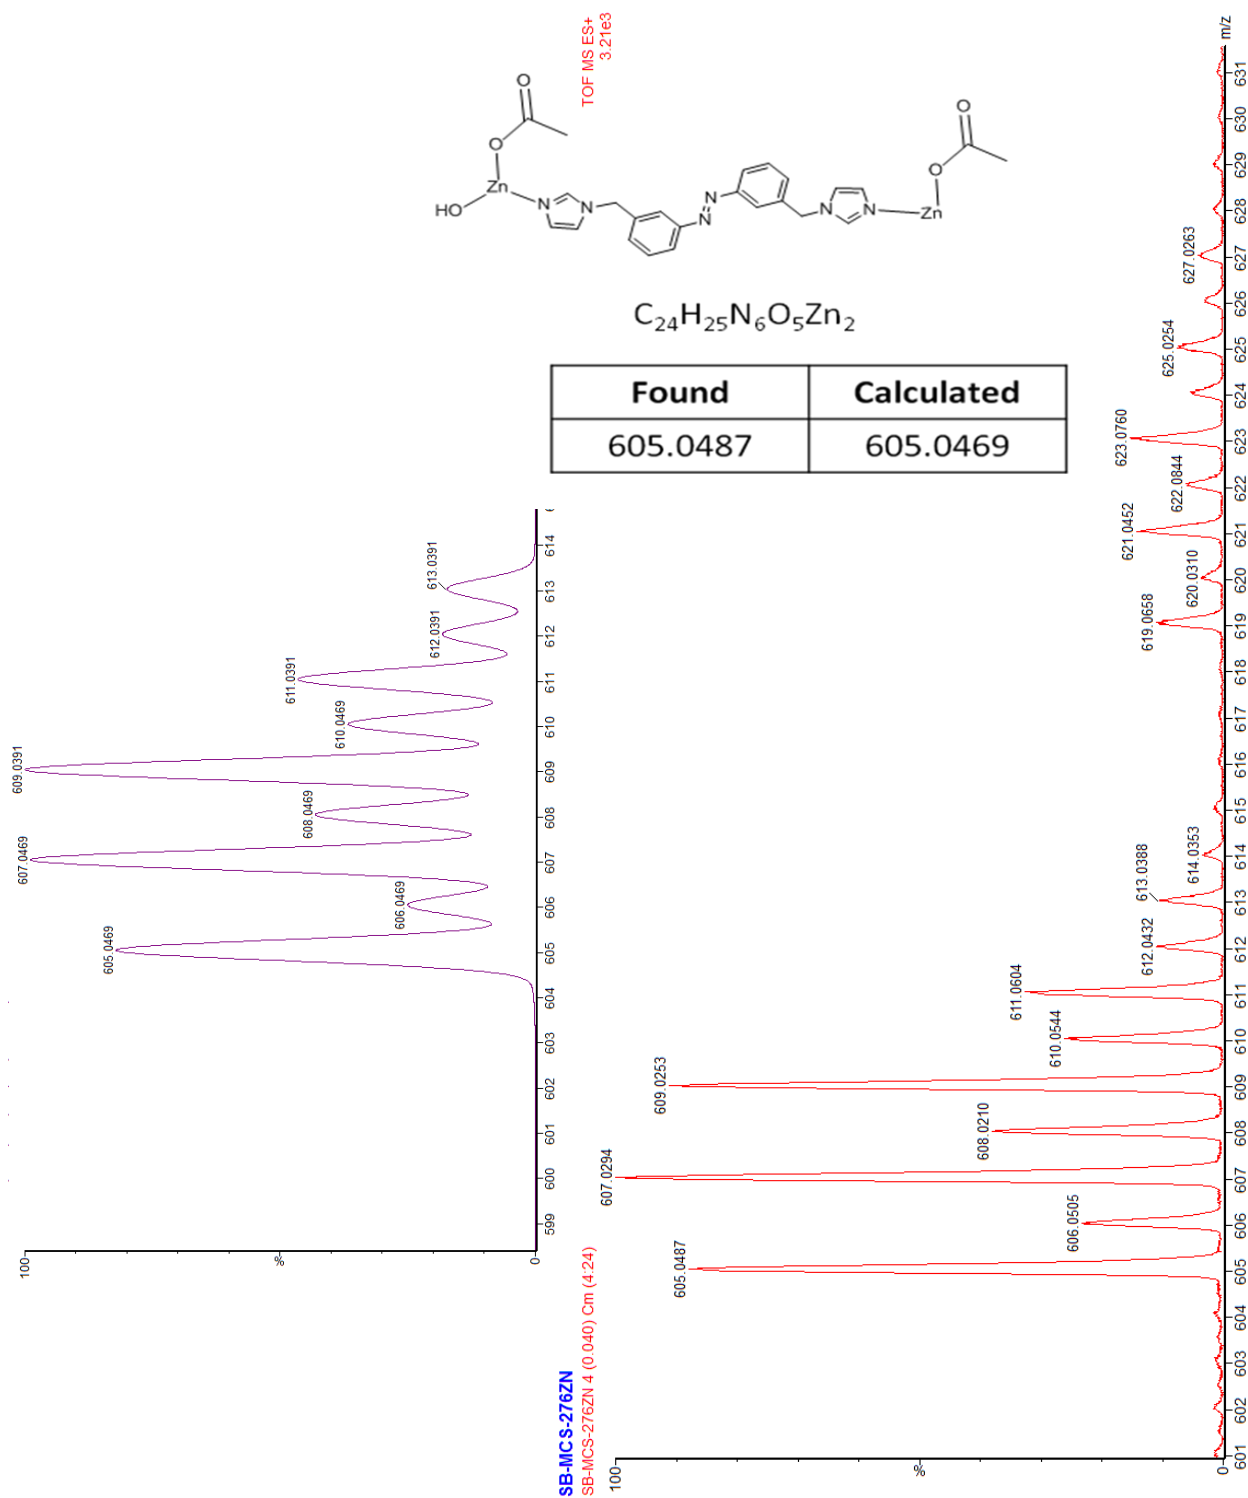

**Fig. S20.** Calculated (top) and HRMS (ESI/Q-TOF) spectrum of  $[Zn^{2+} \cdot trans-1]$

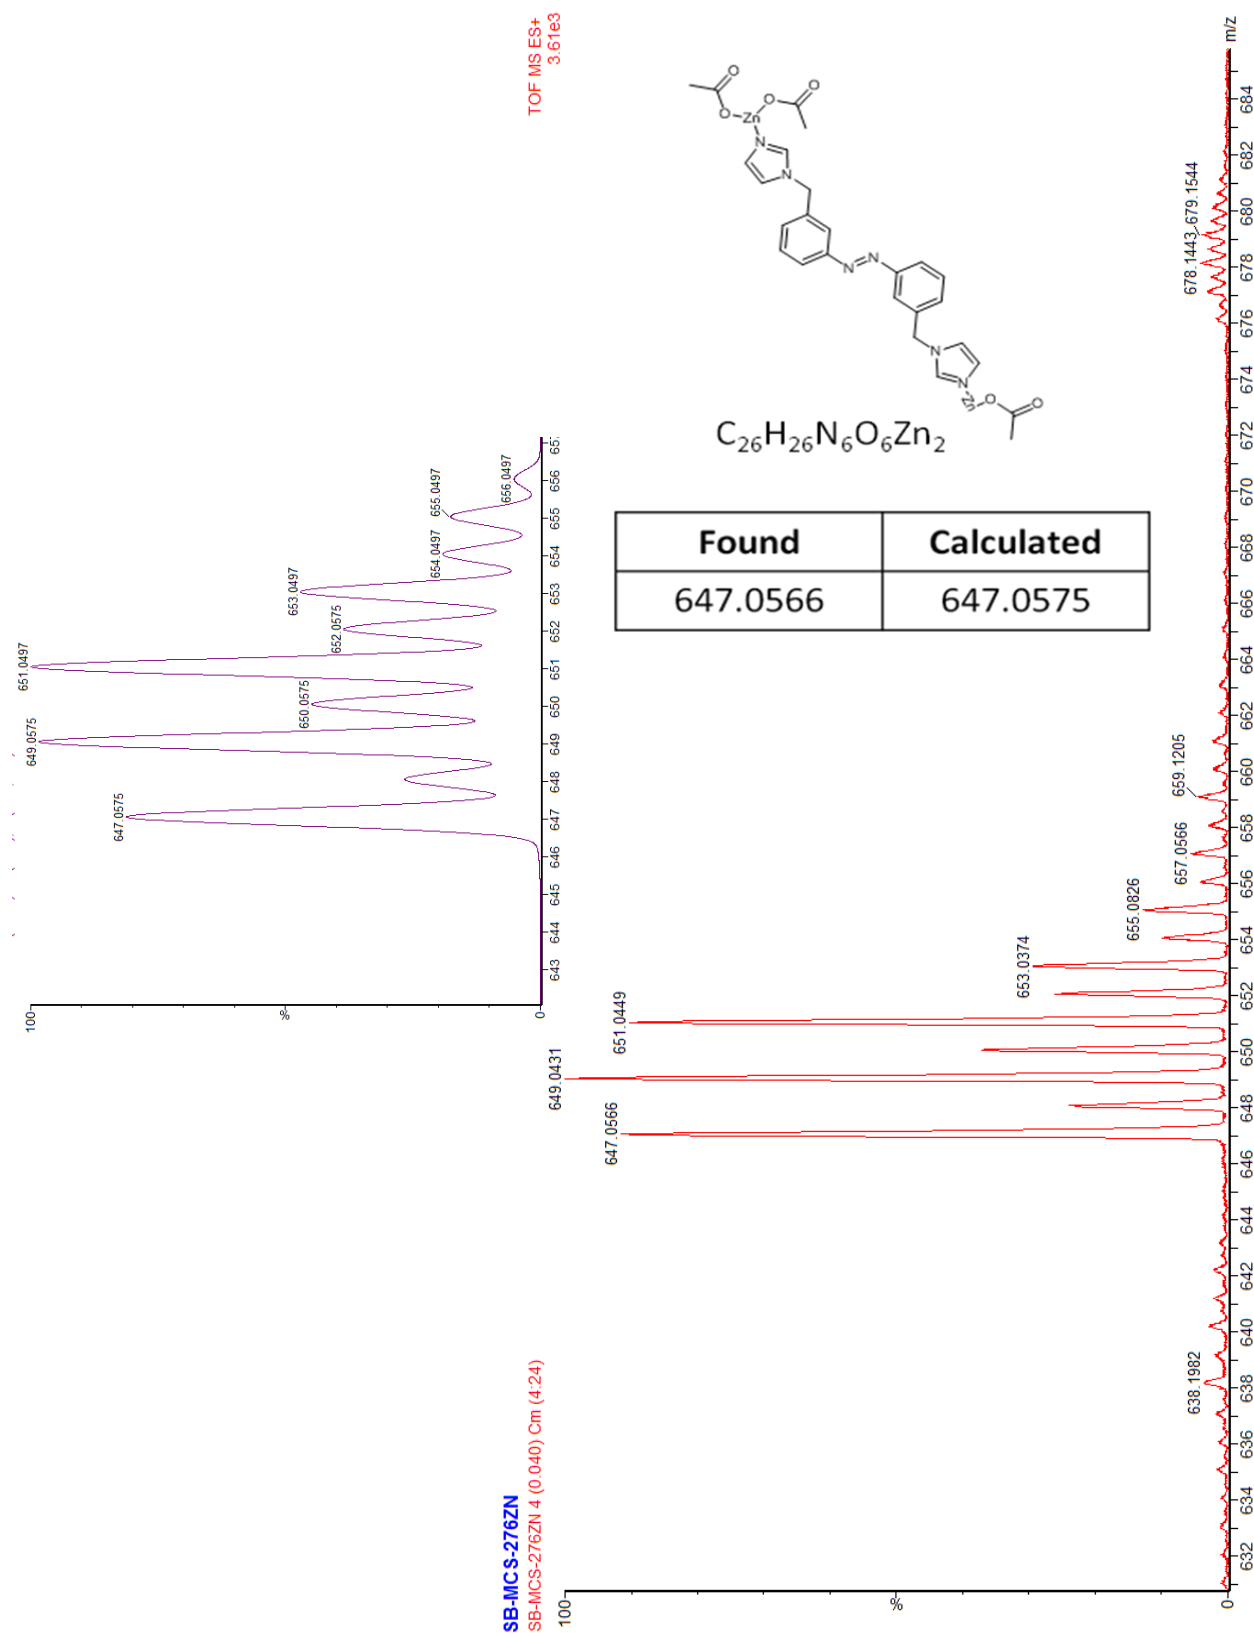

**Fig. S21.** Calculated (top) and HRMS (ESI/Q-TOF) spectrum of [Zn<sup>2+</sup>. *trans*-1]

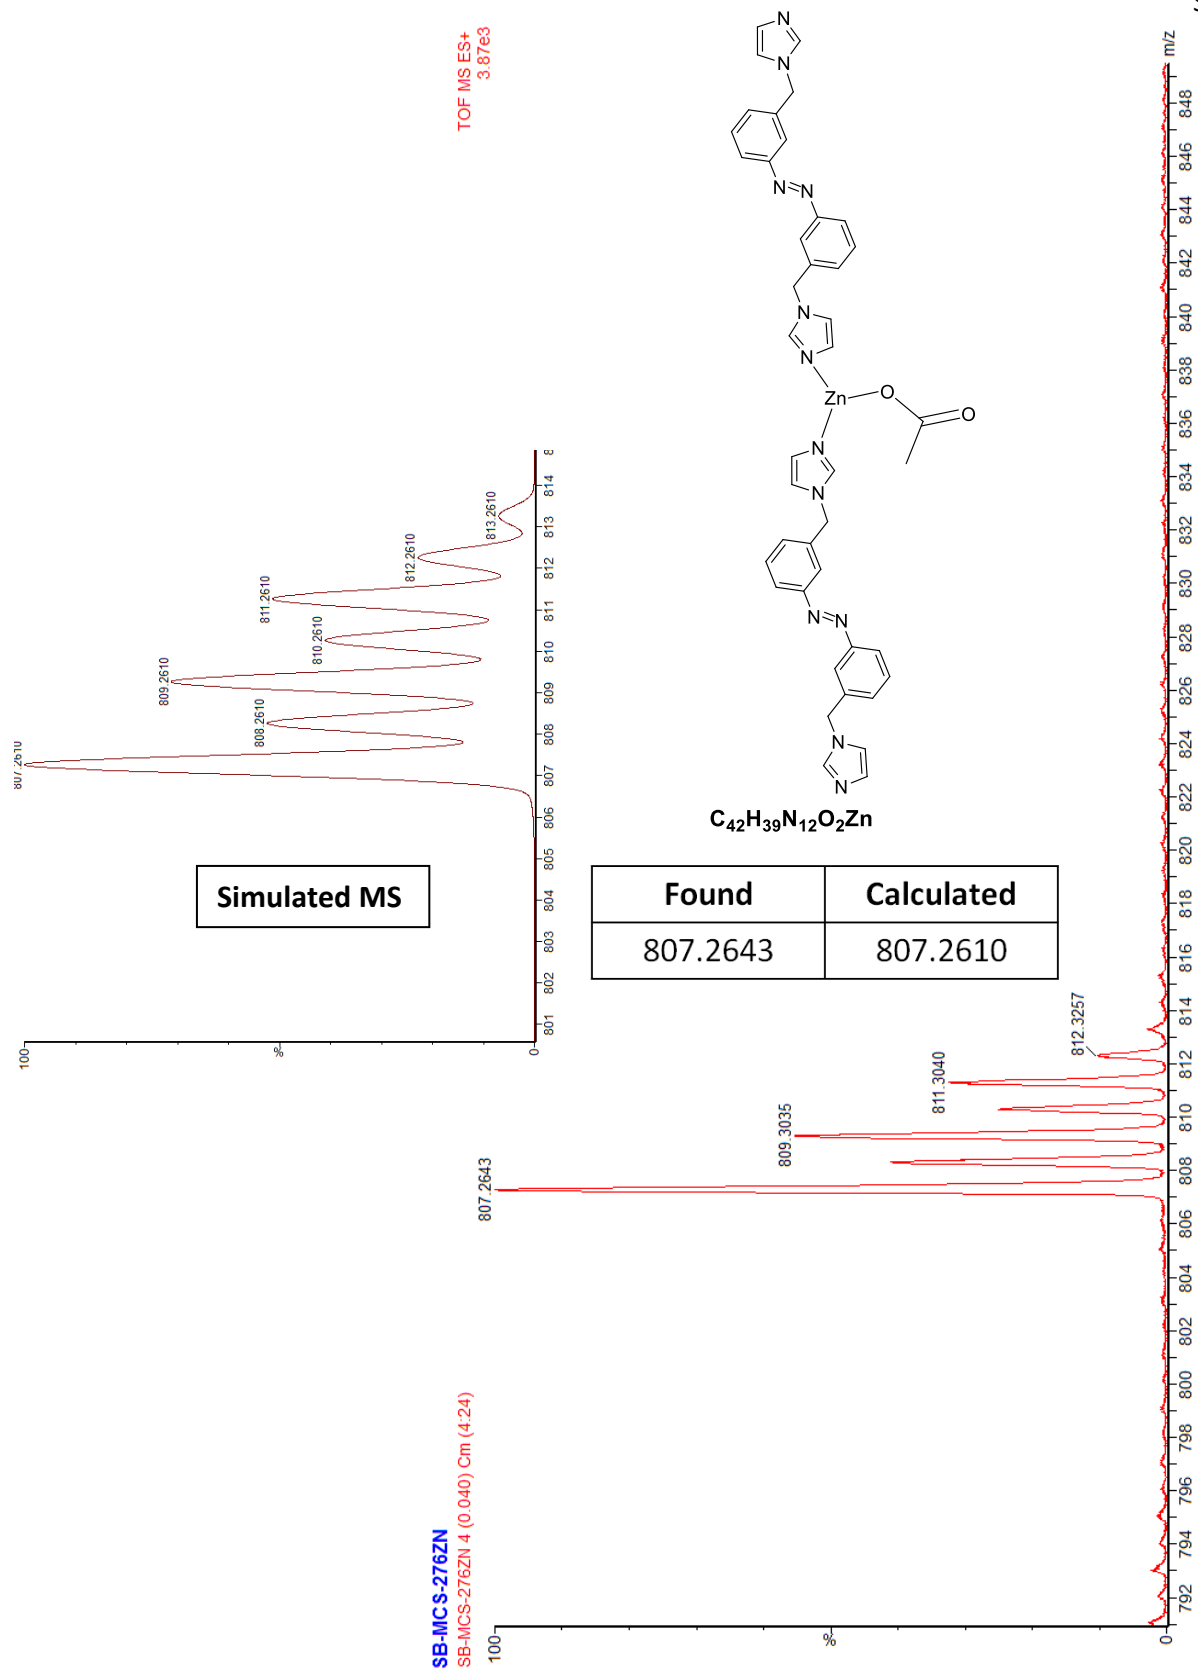

Fig. S22. Calculated (top) and HRMS (ESI/Q-TOF) spectrum of [Zn<sup>2+</sup>. *trans*-1]

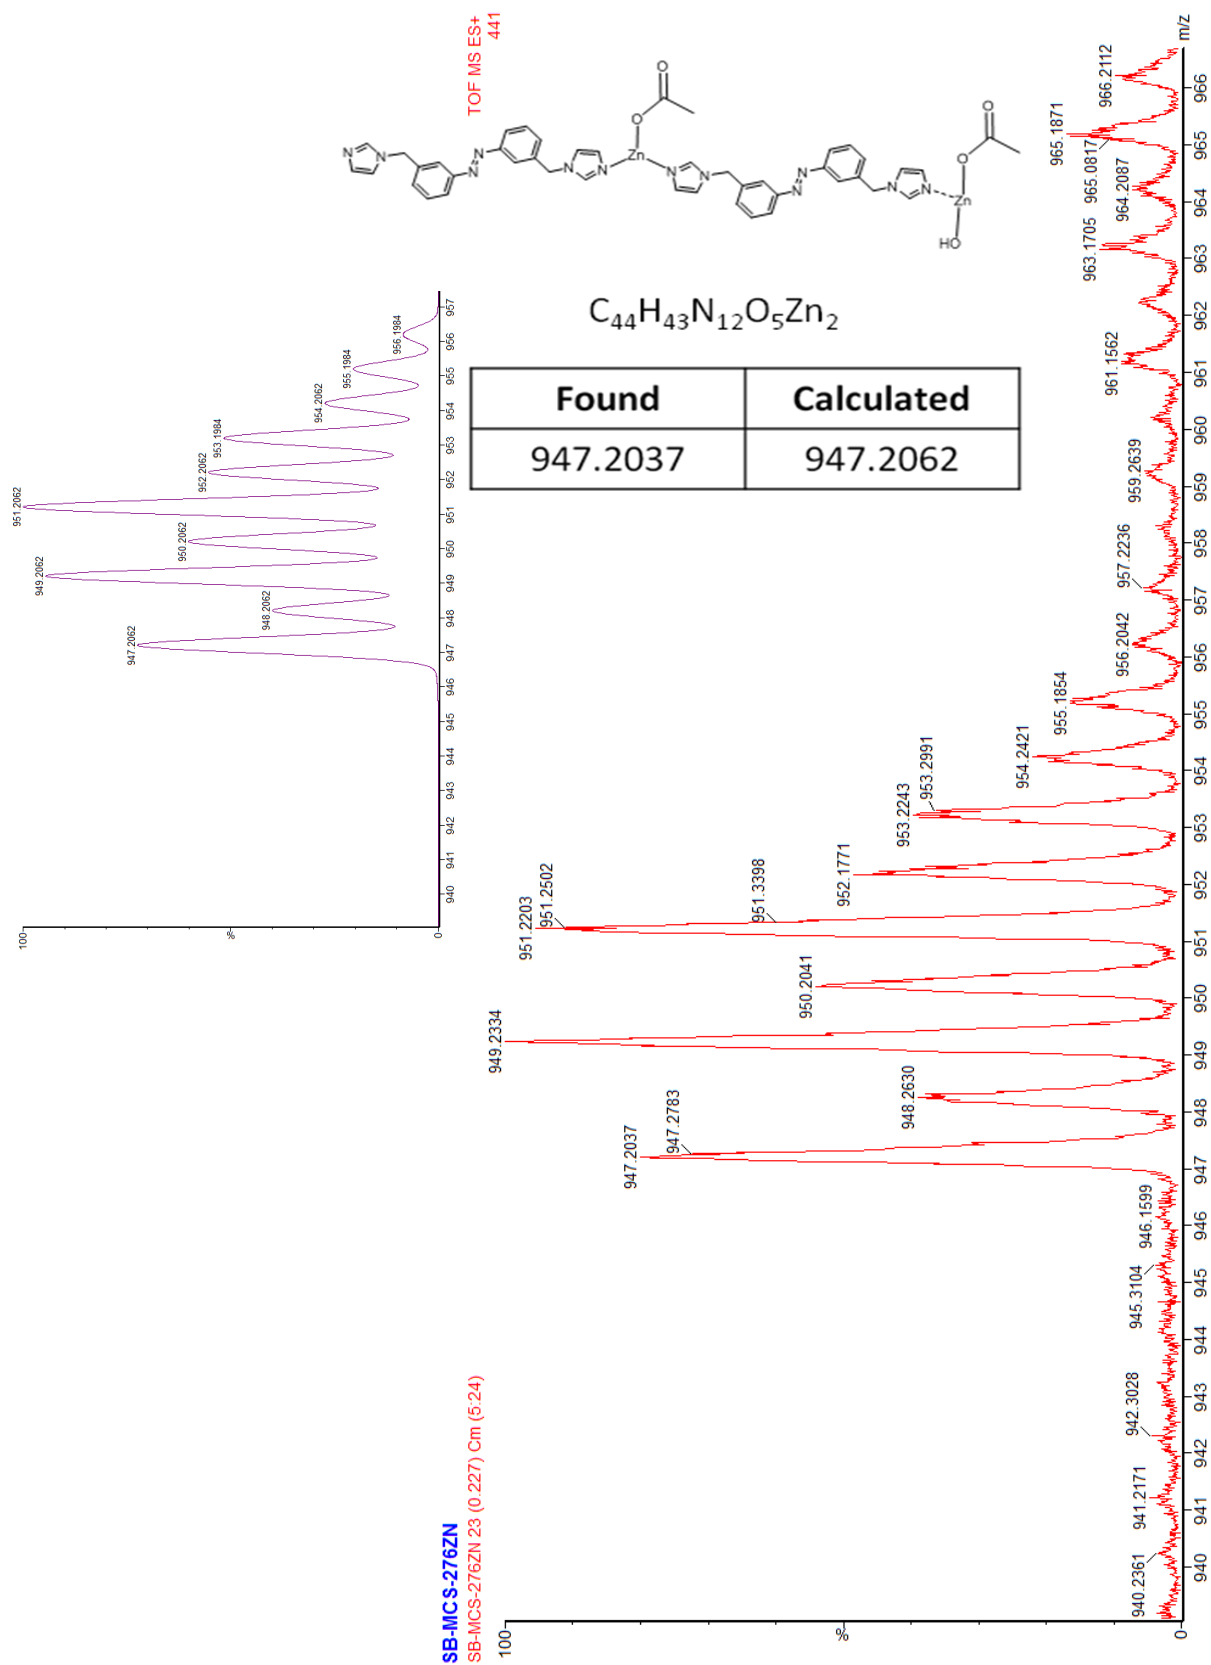

**Fig. S23.** Calculated (top) and HRMS (ESI/Q-TOF) spectrum of  $[Zn^{2+} \cdot trans-1]$

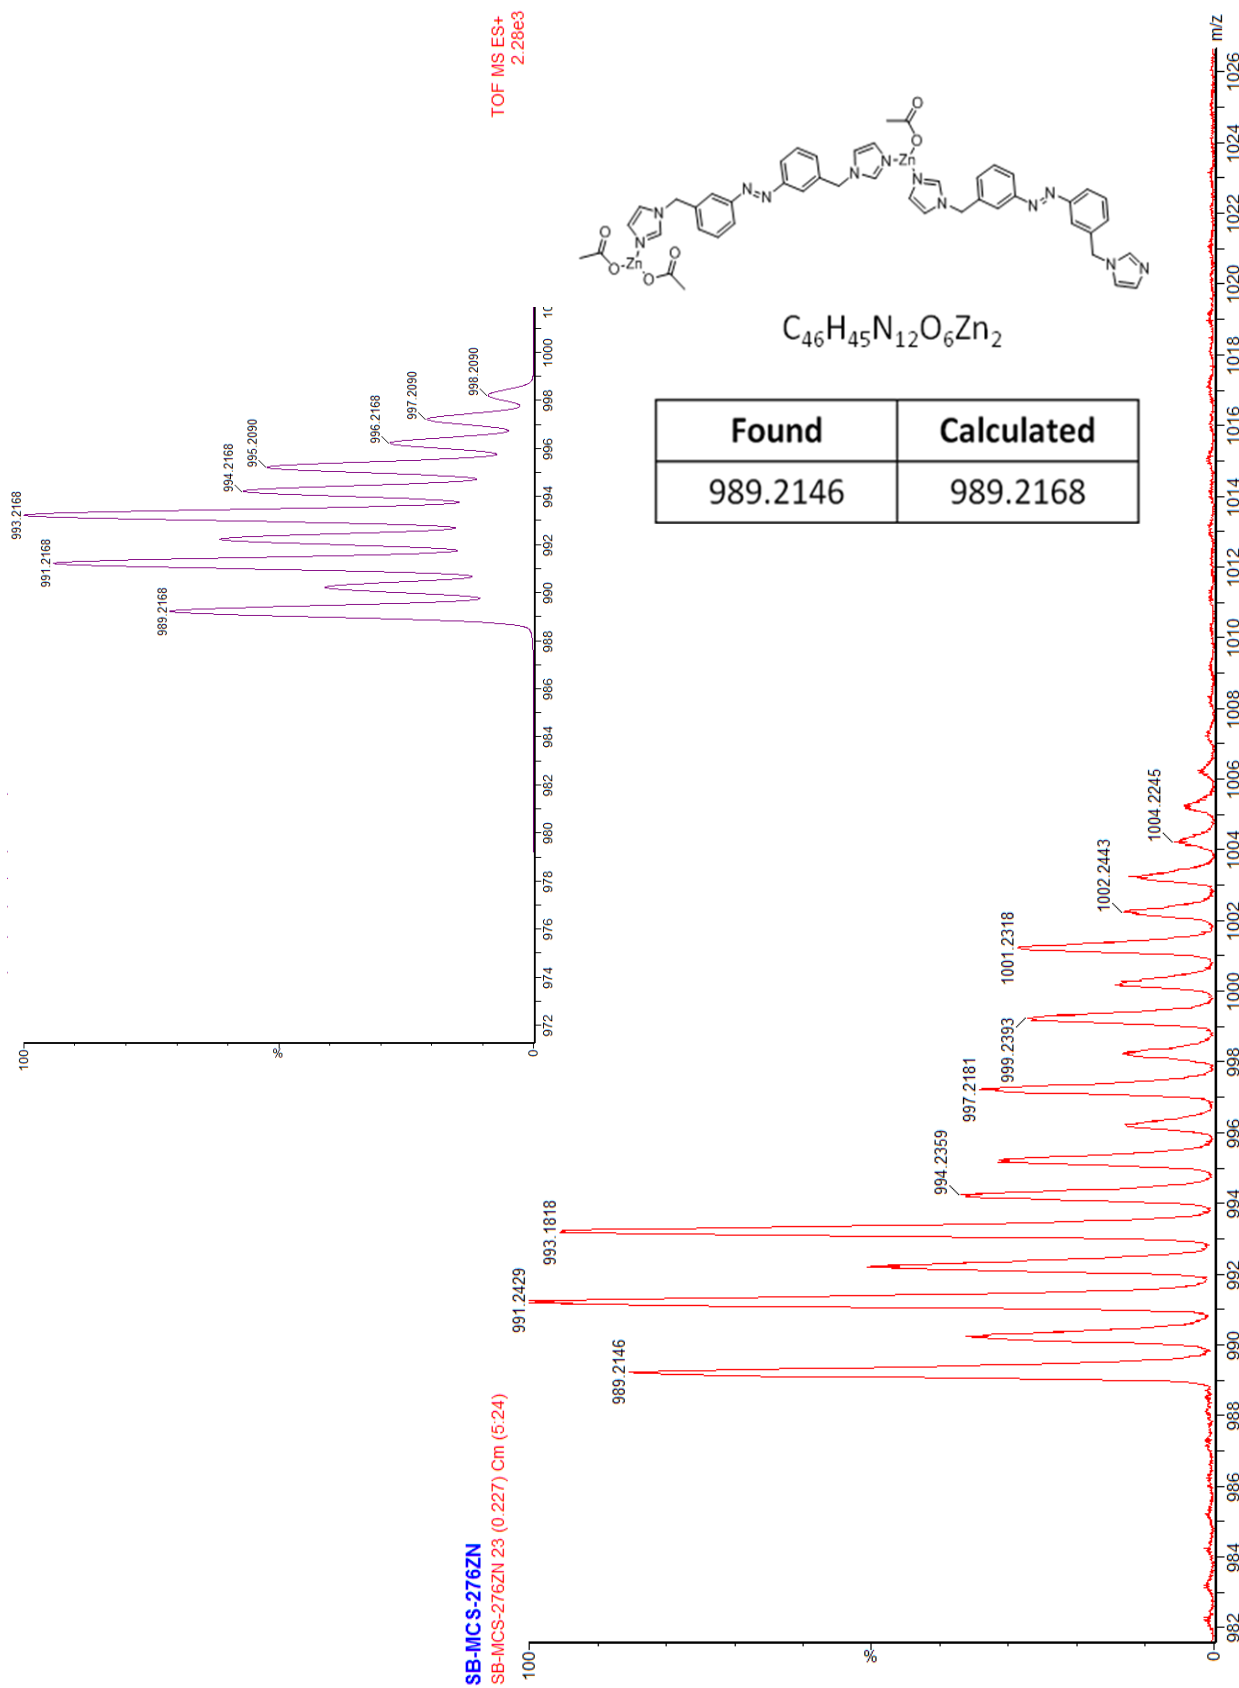

**Fig. S24.** Calculated (top) and HRMS (ESI/Q-TOF) spectrum of  $[Zn^{2+} \cdot \text{trans-1}]$

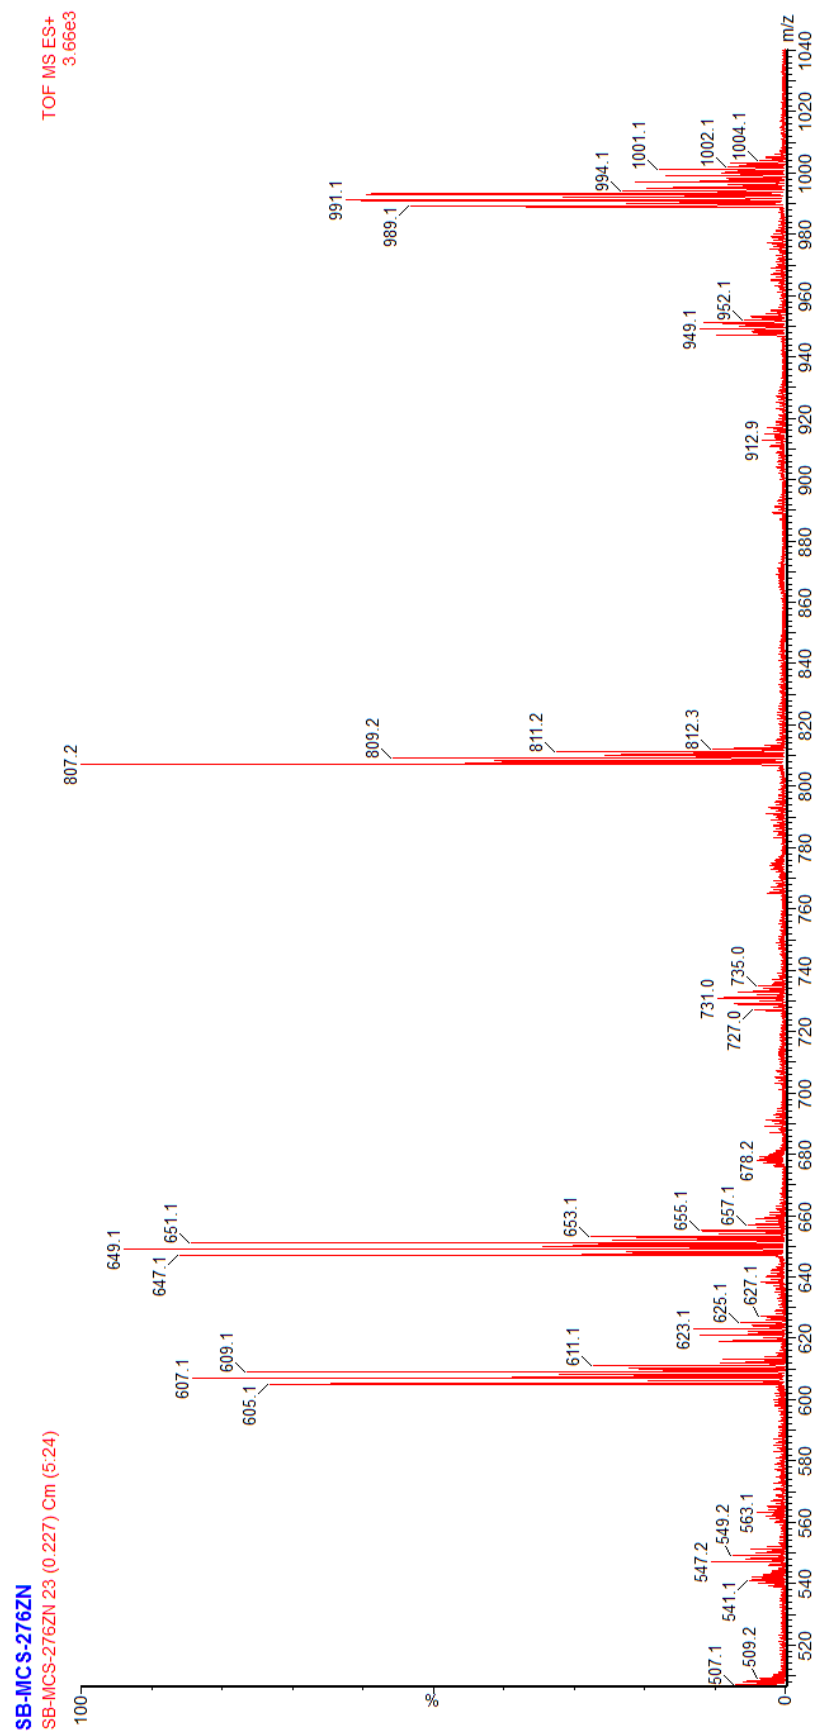

**Fig. S25.** Calculated (top) and HRMS (ESI/Q-TOF) spectrum of  $[Zn^{2+} \cdot \text{trans-1}]$

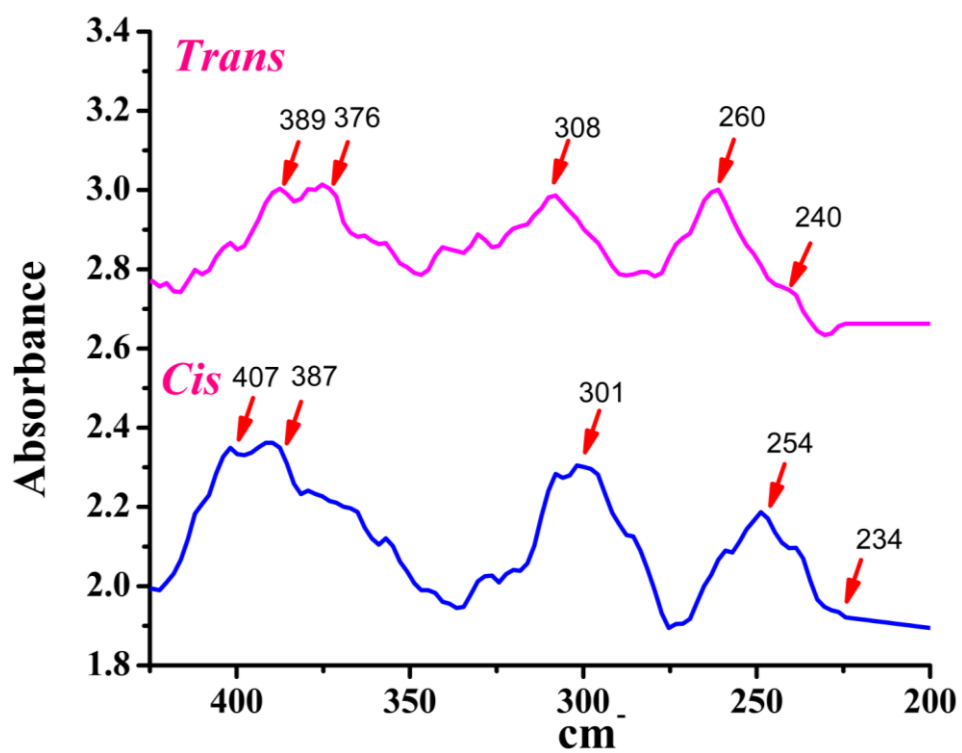

Fig. S26. Far-IR spectra of cis and trans complex of compound 1 with  $\text{Zn}(\text{OAc})_2$

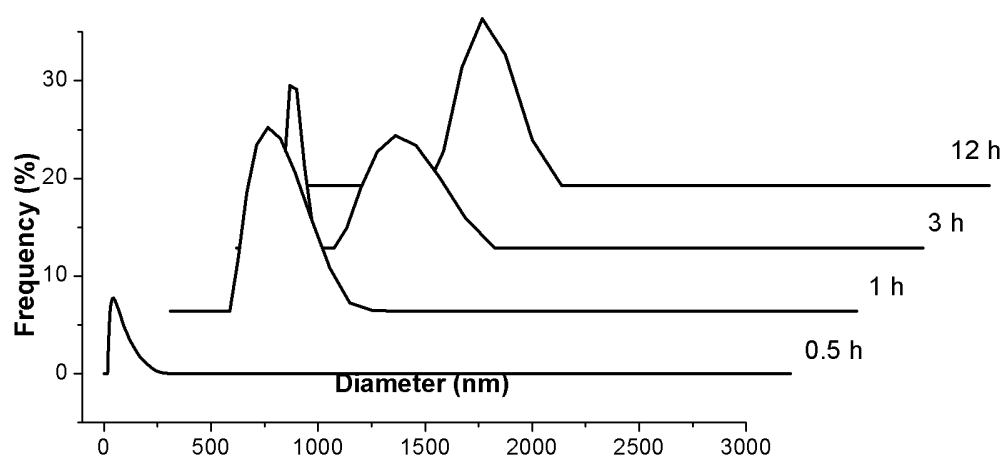

Fig. S27. Time depended DLS Studies of  $[\text{Zn}^{2+} \cdot \text{trans-1}]$ .

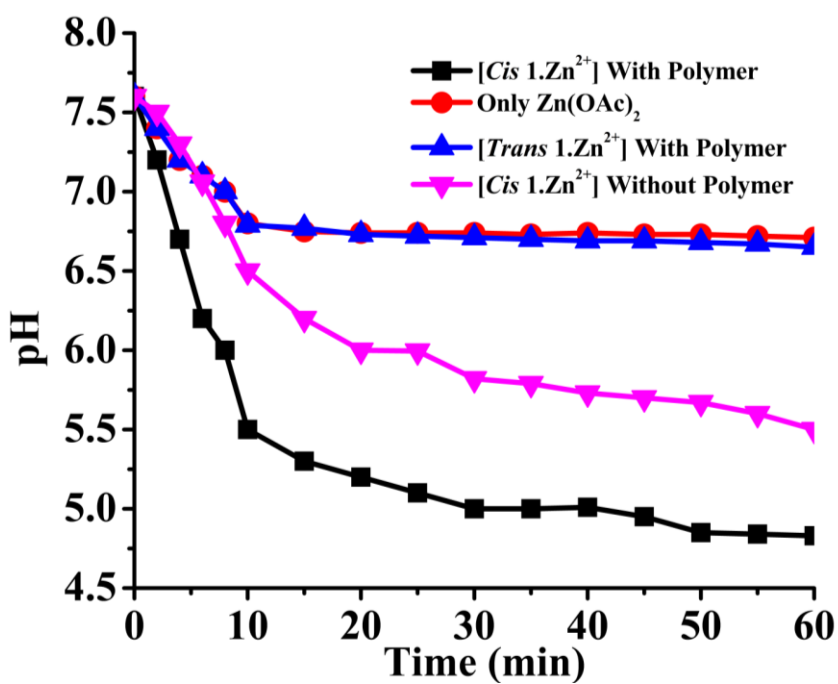

**Fig.S28** Change of the pH upon CO<sub>2</sub> hydration

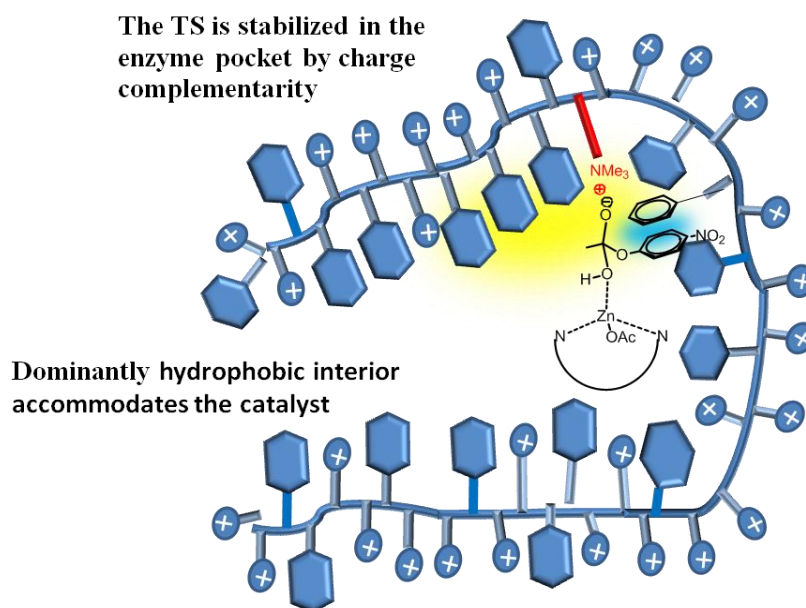

**Fig.S29:** A schematic cartoon representation of stability of transition state with cationic polymer via various non covalent interactions including Coulombic,  $\pi$ - $\pi$ , and  $\pi$ -cation interactions.

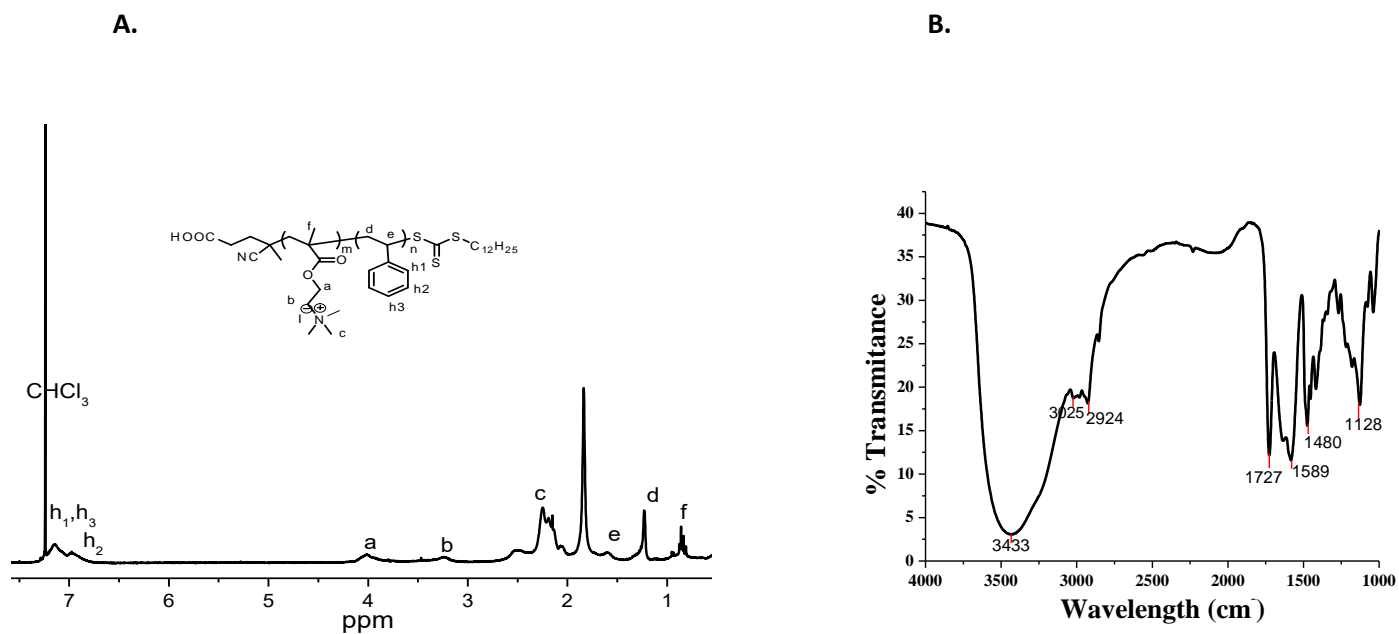

**Fig. S30. (A).**  $^1\text{H}$  NMR spectra of the cationic polymer **A** in  $\text{CDCl}_3$ :  $\text{DMSO-D}_6$  (4:1, v/v).<sup>[1]</sup> **(B).** FTIR of cationic polymer **A**

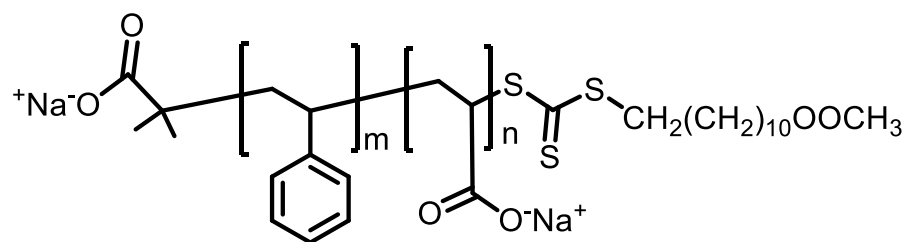

**Fig. S31.** Structure of the anionic polymer.

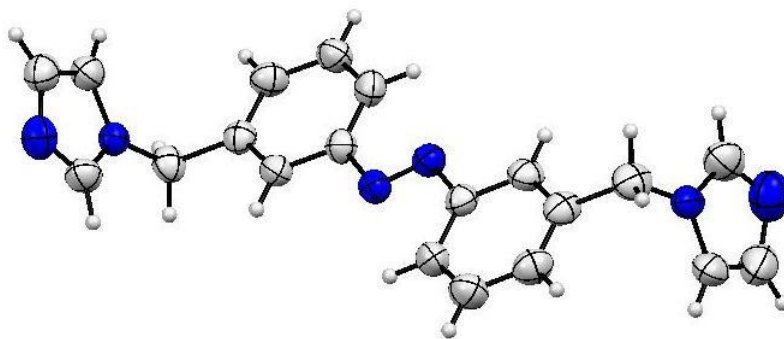

**Fig. S32.** Single crystal XRD structure of *trans*-1. The ellipsoids are shown at the 50% probability level.

**Table S3:** Crystallographic Details of Compound **1**

|                                          |                                                             |
|------------------------------------------|-------------------------------------------------------------|
| Empirical formula                        | C <sub>20</sub> H <sub>18</sub> N <sub>6</sub>              |
| Formula weight                           | 342.15                                                      |
| Temperature/ <i>K</i>                    | 293(2)                                                      |
| Crystal System                           | Orthorhombic                                                |
| Space group                              | P21cn                                                       |
| <i>a</i> /Å                              | 21.6141(19)                                                 |
| <i>b</i> /Å                              | 5.8209(6)                                                   |
| <i>c</i> /Å                              | 14.1510(13)                                                 |
| $\alpha$ /°                              | 90.00                                                       |
| $\beta$ /°                               | 90.00                                                       |
| $\gamma$ /°                              | 90.00                                                       |
| Volume//Å <sup>3</sup>                   | 1780.4(3)                                                   |
| <i>Z</i>                                 | 4                                                           |
| $\rho_{\text{cal}}$ cmg/mm <sup>3</sup>  | 1.299                                                       |
| $\mu$ /mm <sup>-1</sup>                  | 0.100                                                       |
| <i>F</i> (000)                           | 696                                                         |
| 2 $\theta$ range for data collection     | 5.76 to 50.02°                                              |
| Index ranges                             | -25 ≤ <i>h</i> ≤ 25, -6 ≤ <i>k</i> ≤ 6, -16 ≤ <i>l</i> ≤ 16 |
| Reflections collected                    | 5860                                                        |
| Independent reflections                  | 2956[R(int) = 0.0758]                                       |
| Data/restraints/parameters               | 2956/1/289                                                  |
| Goodness-of-fit on <i>F</i> <sup>2</sup> | 0.825                                                       |
| Final <i>R</i> indexes[all data]         | <i>R</i> 1 = 0.0716, <i>wR</i> 2 = 0.1495                   |

|                                                |            |
|------------------------------------------------|------------|
| Largest diff. peak/hole / e<br>Å <sup>-3</sup> | 0.40/-0.15 |
| Flack parameter                                | -1(3)      |

Selected Bond length for compound 1:

| Atom | Atom | Length/ Å |
|------|------|-----------|
| N1   | C14  | 1.351 (4) |
| N1   | C16  | 1.466 (4) |
| N1   | C2   | 1.364 (4) |
| N2   | N4   | 1.247 (3) |
| N2   | C5   | 1.434 (4) |
| N3   | C15  | 1.376 (5) |
| N3   | C3   | 1.469 (5) |
| N3   | C4   | 1.345 (5) |
| N4   | C10  | 1.439 (4) |
| C5   | C8   | 1.384 (4) |
| C5   | C13  | 1.387 (5) |
| C6   | C7   | 1.379 (5) |
| C6   | C12  | 1.382 (5) |
| C6   | C16  | 1.514 (5) |
| C7   | C10  | 1.392 (5) |
| C8   | C9   | 1.407 (5) |
| C9   | C17  | 1.385 (5) |
| C9   | C3   | 1.510 (5) |
| C10  | C19  | 1.384 (5) |
| N11  | C14  | 1.313 (5) |
| N11  | C11  | 1.374 (5) |
| C12  | C18  | 1.392 (5) |
| C13  | C1   | 1.389 (5) |
| C15  | C1A  | 1.333 (6) |
| C17  | C1   | 1.380 (6) |
| C18  | C19  | 1.380 (5) |
| C2   | C11  | 1.340 (5) |
| C4   | N6   | 1.315 (6) |
| N6   | C1A  | 1.390 (6) |

Selected Bond Angle of Compound **1**:

| Atom | Atom | Atom | Angle/°   |
|------|------|------|-----------|
| C14  | N1   | C16  | 126.4 (3) |
| C14  | N1   | C2   | 106.3 (3) |
| C2   | N1   | C16  | 127.2 (3) |
| N4   | N2   | C5   | 115.1 (2) |
| C15  | N3   | C3   | 125.9 (4) |
| C4   | N3   | C15  | 106.5 (4) |
| C4   | N3   | C3   | 127.5 (3) |
| N2   | N4   | C10  | 115.0 (2) |
| C8   | C5   | N2   | 114.9 (3) |
| C8   | C5   | C13  | 121.2 (3) |
| C13  | C5   | N2   | 123.9 (3) |
| C7   | C6   | C12  | 119.1 (3) |
| C7   | C6   | C16  | 119.8 (3) |
| C12  | C6   | C16  | 121.1 (3) |
| C6   | C7   | C10  | 120.8 (3) |
| C5   | C8   | C9   | 119.5 (3) |
| C8   | C9   | C3   | 120.3 (3) |
| C17  | C9   | C8   | 119.0 (3) |
| C17  | C9   | C3   | 120.8 (3) |
| C7   | C10  | N4   | 115.6 (3) |
| C19  | C10  | N4   | 124.5 (3) |
| C19  | C10  | C7   | 119.9 (3) |
| C14  | N11  | C11  | 103.7 (3) |
| C6   | C12  | C18  | 120.4 (3) |
| C5   | C13  | C1   | 118.9 (3) |
| N11  | C14  | N1   | 112.6 (3) |
| C1A  | C15  | N3   | 106.4 (4) |
| N1   | C16  | C6   | 111.1 (3) |
| C1   | C17  | C9   | 111.1 (3) |
| C19  | C18  | C12  | 120.4 (3) |
| C17  | C1   | C13  | 120.6 (3) |
| C11  | C2   | N1   | 106.0 (3) |
| N3   | C3   | C9   | 111.3 (3) |
| N6   | C4   | N3   | 112.5 (4) |
| C2   | C11  | N11  | 111.4 (3) |
| C4   | N6   | C1A  | 104.0 (4) |
| C18  | C19  | C10  | 119.4 (3) |
| C15  | C1A  | N6   | 110.6 (4) |

## References:

1. B. Saha, U. Haldar, and P. De, *Rapid Commun.* 2016, **37**, 1015–1020.
